# Supplementary material for: B(C6F5)3 catalyzed direct nucleophilic substitution of benzylic alcohols: an effective method of constructing C–O, C–S and C–C bonds from benzylic alcohols
Source: Royal Society of Chemistry journal article supplement (doi:10.1039/c8ra05811c), 2018-01-01

## Supporting Information

### **B(C<sub>6</sub>F<sub>5</sub>)<sub>3</sub> Catalyzed Direct Nucleophilic Substitution of Benzylic Alcohols: An Effective Method of Constructing C-O, C-S and C-C Bonds from Benzylic Alcohols**

Shan-Shui Meng\*, Qian Wang, Gong-Bing Huang, Li-Rong Lin, Jun-Ling Zhao\*, Albert S.-C. Chan\*

## Table of contents

|                                                  |         |
|--------------------------------------------------|---------|
| General Information                              | S2      |
| Experiment Section                               | S2-S23  |
| General procedure for alcohol etherification     | S2-S7   |
| General procedure for alcohol thioetherification | S7-S12  |
| General procedure for alcohol arylation          | S12-S18 |
| NMR spectra                                      | S19-S59 |

## General Information

Unless stated otherwise, all reactions were carried out in glassware under air. All solvents were directly used without any pretreatment. NMR spectras were recorded on a Bruker Avance III 400, or Ascend TM 500 spectrometer and were recorded in ppm ( $\delta$ ) downfield of TMS ( $\delta = 0$ ) in deuterated solvent. Signal splitting patterns are described as singlet (s), doublet (d), triplet (t), quartet (q), quintet (quint), or multiplet (m), with coupling constants (J) in hertz. Mass spectra were conducted at LCMS-IT-TOF(ESI).

## Experiment section

### General procedure for alcohol etherification

To a 25ml Schlenk tube was added alcohol **1** (0.2 mmol) and BnOH (25.9 mg, 0.4mmol) and **B**( $C_6F_5$ )<sub>3</sub> (5.5 mg, 0.05 eq), then 1ml DCE was added. The mixture was stirred at 60 °C until the alcohol was disapperaed (monitored by TLC). Then the solvent was removed and the residue was purified by silica gel column chromatography (PE:EA=100:1) to afford product **2**.

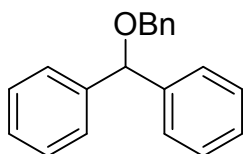

((benzyloxy)methylene)dibenzene **2a**

Colourless oil, 95% yield. Analytical data for **2a**: <sup>1</sup>H NMR (400 MHz, Chloroform-*d*)  $\delta$  7.55 – 6.85 (m, 15H), 5.44 (s, 1H), 4.54 (s, 2H). <sup>13</sup>C NMR (100 MHz, Chloroform-*d*)  $\delta$  142.16, 138.41, 128.42, 128.38, 127.72, 127.55, 127.48, 127.15, 82.49, 70.52. HRMS (ESI) *m/z* [M+Na]<sup>+</sup>: Calcd for C<sub>20</sub>H<sub>18</sub>ONa: 297.1255. Found: 297.1253.

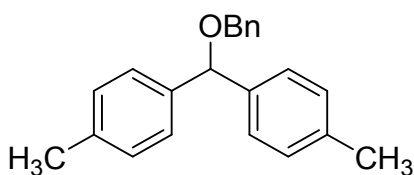

4,4'-((benzyloxy)methylene)bis(methylbenzene) **2b**

Colourless oil, 99% yield. Analytical data for **2b**:  $^1\text{H}$  NMR (400 MHz, Chloroform-*d*)  $\delta$  7.41 – 7.29 (m, 4H), 7.25 (m, 5H), 7.11 (d,  $J$  = 8.0 Hz, 4H), 5.38 (s, 1H), 4.52 (s, 2H), 2.30 (s, 6H).  $^{13}\text{C}$  NMR (100 MHz, Chloroform-*d*)  $\delta$  139.47, 138.65, 137.06, 129.14, 128.39, 127.74, 127.51, 127.10, 82.24, 70.40, 21.21. HRMS (ESI)  $m/z$   $[\text{M}+\text{Na}]^+$ : Calcd for  $\text{C}_{22}\text{H}_{22}\text{ONa}$ : 325.1568. Found: 325.1560.

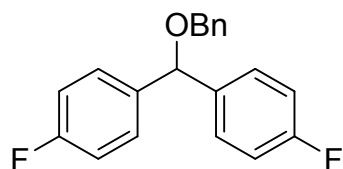

4,4'-((benzyloxy)methylene)bis(fluorobenzene) **2c**

Colourless oil, 95% yield. Analytical data for **2c**:  $^1\text{H}$  NMR (400 MHz, Chloroform-*d*)  $\delta$  7.38 – 7.12 (m, 9H), 7.02 – 6.76 (m, 5H), 5.31 (s, 1H), 4.42 (s, 2H).  $^{13}\text{C}$  NMR (100 MHz, Chloroform-*d*)  $\delta$  162.39, 159.94, 136.82 (d,  $J$  = 30.0 Hz), 127.72, 127.64, 127.40, 126.68, 114.29 (d,  $J$  = 21.4 Hz), 79.99, 69.47.  $^{19}\text{F}$  NMR (376 MHz, Chloroform-*d*)  $\delta$  -114.82. HRMS (ESI)  $m/z$   $[\text{M}+\text{Na}]^+$ : Calcd for  $\text{C}_{20}\text{H}_{16}\text{F}_2\text{ONa}$ : 333.1067. Found: 333.1058.

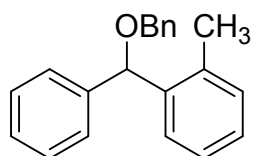

1-((benzyloxy)(phenyl)methyl)-2-methylbenzene **2d**

Colourless oil, 97% yield. Analytical data for **2d**:  $^1\text{H}$  NMR (400 MHz, Chloroform-*d*)  $\delta$  7.51 (d,  $J$  = 7.4 Hz, 1H), 7.41 – 7.26 (m, 9H), 7.20 (dt,  $J$  = 15.3, 7.0 Hz, 3H), 7.12 (d,  $J$  = 7.2 Hz, 1H), 5.60 (s, 1H), 4.57 (d,  $J$  = 11.9 Hz, 1H), 4.48 (d,  $J$  = 11.9 Hz, 1H), 2.19 (s, 3H).  $^{13}\text{C}$  NMR (100 MHz, Chloroform-*d*)  $\delta$  141.21, 139.62, 138.47, 136.15, 130.66, 128.42, 128.37, 127.88, 127.69, 127.62, 127.57, 127.48, 127.41, 126.12, 79.94, 70.72, 19.52. HRMS (ESI)  $m/z$   $[\text{M}+\text{Na}]^+$ : Calcd for  $\text{C}_{21}\text{H}_{20}\text{ONa}$ : 311.1412. Found: 311.1417.

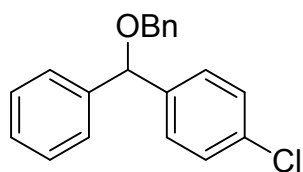

1-((benzyloxy)(phenyl)methyl)-4-chlorobenzene **2e**

Colourless oil, 98% yield. Analytical data for **2e**:  $^1\text{H}$  NMR (500 MHz, Chloroform-*d*)  $\delta$  7.43 – 7.22 (m, 14H), 5.40 (s, 1H), 4.59 – 4.44 (m, 2H).  $^{13}\text{C}$  NMR (125 MHz,  $\text{CDCl}_3$ )  $\delta$  141.65, 140.80, 138.14, 133.23, 128.60, 128.58, 128.47, 128.46, 127.78, 127.76, 127.71, 127.13, 81.74, 70.55. HRMS (ESI)  $m/z$   $[\text{M}+\text{Na}]^+$ : Calcd for  $\text{C}_{21}\text{H}_{20}\text{ClONa}$ : 331.0866. Found: 331.0864.

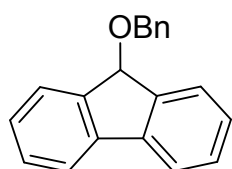

9-(benzyloxy)-9H-fluorene **2f**

Colourless oil, 88% yield. Analytical data for **2f**:  $^1\text{H}$  NMR (400 MHz, Chloroform-*d*)  $\delta$  7.68 (dd,  $J = 12.6$ , 7.5 Hz, 4H), 7.41 (t,  $J = 7.3$  Hz, 2H), 7.36 – 7.23 (m, 7H), 5.79 (s, 1H), 4.20 (s, 2H).  $^{13}\text{C}$  NMR (100 MHz, Chloroform-*d*)  $\delta$  142.79, 140.94, 138.58, 129.08, 128.33, 127.84, 127.63, 127.56, 125.56, 120.02, 80.80, 66.62. HRMS (ESI)  $m/z$   $[\text{M}+\text{Na}]^+$ : Calcd for  $\text{C}_{20}\text{H}_{16}\text{ONa}$ : 295.1099. Found: 295.1090.

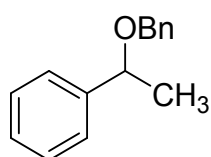

(1-(benzyloxy)ethyl)benzene **2g**

Colourless oil, 96% yield. Analytical data for **2g**:  $^1\text{H}$  NMR (400 MHz, Chloroform-*d*)  $\delta$  7.35 (d,  $J = 4.4$  Hz, 4H), 7.29 (m, 6H), 4.57 – 4.39 (m, 2H), 4.29 (d,  $J = 11.9$  Hz, 1H), 1.48 (d,  $J = 6.5$  Hz, 3H).  $^{13}\text{C}$  NMR (100 MHz, Chloroform-*d*)  $\delta$  143.78, 138.70, 128.55, 128.40, 127.74, 127.55, 127.51, 126.39, 77.28, 70.36, 24.27. HRMS (ESI)  $m/z$   $[\text{M}+\text{Na}]^+$ : Calcd for  $\text{C}_{15}\text{H}_{16}\text{ONa}$ : 235.1099. Found: 235.1098.

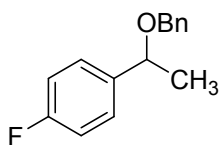

1-(1-(benzyloxy)ethyl)-4-fluorobenzene **2h**

Colourless oil, 93% yield. Analytical data for **2h**:  $^1\text{H}$  NMR (500 MHz,  $\text{CDCl}_3$ )  $\delta$  7.40 – 7.18 (m, 7H), 7.04 (t,  $J$  = 8.6 Hz, 2H), 4.53 – 4.38 (m, 2H), 4.28 (d,  $J$  = 11.8 Hz, 1H), 1.45 (d,  $J$  = 6.5 Hz, 3H).  $^{13}\text{C}$  NMR (125 MHz,  $\text{CDCl}_3$ )  $\delta$  162.24 (d,  $J$  = 245.1 Hz), 139.47 (d,  $J$  = 3.0 Hz), 138.50, 128.44, 127.96 (d,  $J$  = 8.0 Hz), 127.72, 127.60, 115.37 (d,  $J$  = 21.3 Hz), 76.55, 70.31, 24.23.  $^{19}\text{F}$  NMR (471 MHz,  $\text{CDCl}_3$ )  $\delta$  -115.16. HRMS (ESI)  $m/z$   $[\text{M}+\text{Na}]^+$ : Calcd for  $\text{C}_{15}\text{H}_{16}\text{FO}$ : 231.1185. Found: 231.1190.

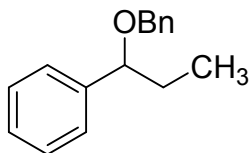

(1-(benzyloxy)propyl)benzene **2i**

Colourless oil, 94% yield. Analytical data for **2i**:  $^1\text{H}$  NMR (400 MHz,  $\text{CDCl}_3$ )  $\delta$  7.41 – 7.15 (m, 10H), 4.46 (d,  $J$  = 11.9 Hz, 1H), 4.23 (dd,  $J$  = 17.4, 9.4 Hz, 2H), 1.96 – 1.81 (m, 1H), 1.79 – 1.60 (m, 1H), 0.90 (t,  $J$  = 7.4 Hz, 3H).  $^{13}\text{C}$  NMR (100 MHz,  $\text{CDCl}_3$ )  $\delta$  142.49, 138.75, 128.38, 128.34, 127.76, 127.51, 127.46, 126.93, 82.99, 70.40, 31.20, 10.41. HRMS (ESI)  $m/z$   $[\text{M}+\text{Na}]^+$ : Calcd for  $\text{C}_{16}\text{H}_{18}\text{ONa}$ : 249.1255. Found: 249.1256.

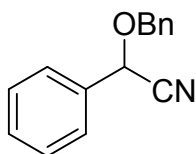

2-(benzyloxy)-2-phenylacetonitrile **2j**

Colourless oil, 94% yield. Analytical data for **2j**:  $^1\text{H}$  NMR (500 MHz,  $\text{CDCl}_3$ )  $\delta$  7.48 (m, 2H), 7.46 – 7.31 (m, 8H), 5.26 (s, 1H), 4.84 (d,  $J$  = 11.6 Hz, 1H), 4.69 (d,  $J$  = 11.6 Hz, 1H).  $^{13}\text{C}$  NMR (125 MHz,  $\text{CDCl}_3$ )  $\delta$

135.74, 133.41, 129.84, 129.06, 128.75, 128.58, 128.38, 127.41, 117.19, 71.65, 69.42. HRMS (ESI)  $m/z$   $[M+K]^+$ : Calcd for  $C_{15}H_{13}NOK$ : 262.0634. Found: 262.0630.

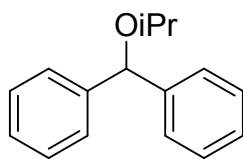

(isopropoxymethylene)dibenzene **2k**

Colourless oil, 96% yield. Analytical data for **2k**:  $^1H$  NMR (400 MHz, Chloroform-*d*)  $\delta$  7.21 (m, 10H), 5.40 (s, 1H), 3.58 (dt,  $J = 12.2, 6.1$  Hz, 1H), 1.13 (d,  $J = 6.1$  Hz, 6H).  $^{13}C$  NMR (100 MHz, Chloroform-*d*)  $\delta$  143.04, 128.37, 127.30, 127.14, 80.52, 69.15, 22.33. HRMS (ESI)  $m/z$   $[M+Na]^+$ : Calcd for  $C_{16}H_{18}ONa$ : 249.1255. Found: 249.1253.

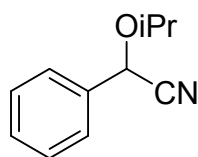

2-isopropoxy-2-phenylacetonitrile **2l**

Colourless oil, 92% yield. Analytical data for **2l**:  $^1H$  NMR (400 MHz, Chloroform-*d*)  $\delta$  7.53 – 7.47 (m, 2H), 7.46 – 7.33 (m, 3H), 5.27 (s, 1H), 4.03 (q,  $J = 6.1$  Hz, 1H), 1.29 (dd,  $J = 14.6, 6.1$  Hz, 6H).  $^{13}C$  NMR (100 MHz, Chloroform-*d*)  $\delta$  134.30, 129.58, 128.99, 127.16, 118.13, 72.32, 68.30, 22.56, 21.24. HRMS (ESI)  $m/z$   $[M+K]^+$ : Calcd for  $C_{11}H_{13}NOK$ : 214.0634. Found: 214.0644.

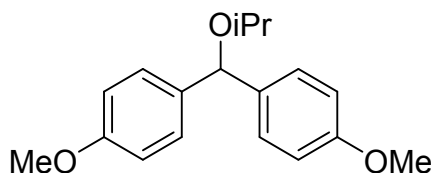

4,4'-(isopropoxymethylene)bis(methoxybenzene) **2m**

Colourless oil, 91% yield. Analytical data for **2m**:  $^1H$  NMR (500 MHz,  $CDCl_3$ )  $\delta$  7.27 (d,  $J = 8.7$  Hz, 4H), 6.87 (d,  $J = 8.6$  Hz, 4H), 5.43 (s, 1H), 3.81 (s, 6H), 3.66 (dt,  $J = 12.2, 6.1$  Hz, 1H), 1.23 (d,  $J = 6.1$  Hz,

6H).  $^{13}\text{C}$  NMR (125 MHz,  $\text{CDCl}_3$ )  $\delta$  158.74, 135.40, 128.25, 113.67, 79.53, 68.77, 55.26, 22.29. HRMS (ESI)  $m/z$   $[\text{M}+\text{Na}]^+$ : Calcd for  $\text{C}_{18}\text{H}_{22}\text{O}_3\text{Na}$ : 309.1467. Found: 309.1470.

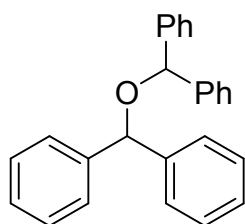

(oxybis(methanetriyl))tetrabenzene **2n**

Colourless oil, 95% yield. Analytical data for **2n**:  $^1\text{H}$  NMR (400 MHz, Chloroform-*d*)  $\delta$  7.69 – 6.92 (m, 20H), 5.40 (s, 2H).  $^{13}\text{C}$  NMR (100 MHz, Chloroform-*d*)  $\delta$  142.23, 128.41, 127.45, 127.29, 80.02. HRMS (ESI)  $m/z$   $[\text{M}+\text{Na}]^+$ : Calcd for  $\text{C}_{26}\text{H}_{22}\text{ONa}$ : 373.1568. Found: 373.1567.

### General procedure for alcohol thioetherification

To a 25ml Schlenk tube was added alcohol **1** (0.2 mmol) and 4-methylbenzenethiol (29.7 mg, 0.24 mmol) and **B(C<sub>6</sub>F<sub>5</sub>)<sub>3</sub>** (5.5 mg, 0.05 eq), then 1ml DCE was added. The mixture was stirred at 60 °C until the alcohol was disappeared (monitored by TLC). Then the solvent was removed and the residue was purified by silica gel column chromatography (PE:EA=100:1) to afford product **3**.

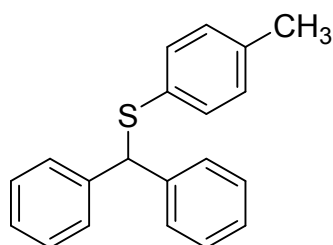

Benzhydryl(p-tolyl)sulfane **3a**

Colourless oil, 97% yield. Analytical data for **3a**:  $^1\text{H}$  NMR (400 MHz,  $\text{CDCl}_3$ )  $\delta$  7.47 – 7.36 (m, 4H), 7.32 – 7.24 (m, 4H), 7.24 – 7.15 (m, 2H), 7.16 – 7.08 (m, 2H), 6.97 (d,  $J$  = 7.9 Hz, 2H), 5.46 (s, 1H), 2.24 (s,



3H).  $^{13}\text{C}$  NMR (100 MHz,  $\text{CDCl}_3$ )  $\delta$  141.25, 136.86, 132.31, 131.38, 129.55, 128.52, 128.46, 127.20, 58.08, 21.09. HRMS (ESI)  $m/z$   $[\text{M}+\text{K}]^+$ : Calcd for  $\text{C}_0\text{H}_{18}\text{SK}$ : 329.0766. Found: 329.0771.

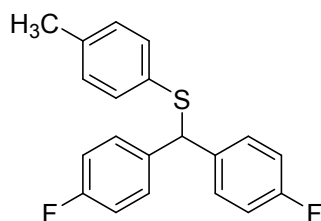

(bis(4-fluorophenyl)methyl)(p-tolyl)sulfane **3b**

Colourless oil, 94% yield. Analytical data for **3b**:  $^1\text{H}$  NMR (500 MHz,  $\text{CDCl}_3$ )  $\delta$  7.37 – 7.30 (m, 3H), 7.12 (d,  $J = 8.1$  Hz, 2H), 7.04 – 6.92 (m, 5H), 5.42 (s, 1H), 2.27 (s, 3H).  $^{13}\text{C}$  NMR (125 MHz,  $\text{CDCl}_3$ )  $\delta$  161.89 (d,  $J = 246.3$  Hz), 137.33, 56.62, 21.08.  $^{19}\text{F}$  NMR (376 MHz,  $\text{CDCl}_3$ )  $\delta$  -115.14. HRMS (ESI)  $m/z$   $[\text{M}+\text{K}]^+$ : Calcd for  $\text{C}_{20}\text{H}_{16}\text{F}_2\text{KS}$ : 365.0578. Found: 365.0634.

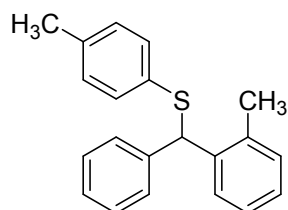

(phenyl(o-tolyl)methyl)(p-tolyl)sulfane **3c**

Colourless oil, 95% yield. Analytical data for **3c**:  $^1\text{H}$  NMR (400 MHz,  $\text{CDCl}_3$ )  $\delta$  7.55 (d,  $J = 7.3$  Hz, 1H), 7.37 (d,  $J = 7.3$  Hz, 2H), 7.26 (t,  $J = 7.4$  Hz, 2H), 7.23 – 7.08 (m, 6H), 6.97 (d,  $J = 7.9$  Hz, 2H), 5.65 (s, 1H), 2.32 (s, 3H), 2.24 (s, 3H).  $^{13}\text{C}$  NMR (100 MHz,  $\text{CDCl}_3$ )  $\delta$  140.59, 139.06, 136.63, 135.88, 132.87, 130.69, 130.57, 129.59, 128.80, 128.59, 128.45, 127.19, 127.09, 126.30, 54.39, 21.07, 19.68. HRMS (ESI)  $m/z$   $[\text{M}+\text{K}]^+$ : Calcd for  $\text{C}_{21}\text{H}_{20}\text{KS}$ : 343.0923. Found: 343.1022.

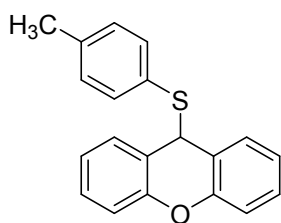

9-(p-tolylthio)-9H-xanthene **3d**

Colourless oil, 96% yield. Analytical data for **3d**:  $^1\text{H}$  NMR (400 MHz,  $\text{CDCl}_3$ )  $\delta$  7.32 – 7.24 (m, 2H), 7.23 – 7.11 (m, 2H), 7.04 (td,  $J = 7.5, 1.1$  Hz, 2H), 6.94 – 6.86 (m, 4H), 6.79 (d,  $J = 8.1$  Hz, 2H), 5.44 (s, 1H), 2.29 (s, 3H).  $^{13}\text{C}$  NMR (100 MHz,  $\text{CDCl}_3$ )  $\delta$  152.12, 138.99, 136.28, 129.52, 129.23, 128.42, 127.84, 123.07, 121.39, 116.22, 47.68, 21.29. HRMS (ESI)  $m/z$   $[\text{M}+\text{K}]^+$ : Calcd for  $\text{C}_{20}\text{H}_{16}\text{OKS}$ : 343.0559. Found: 343.0567.

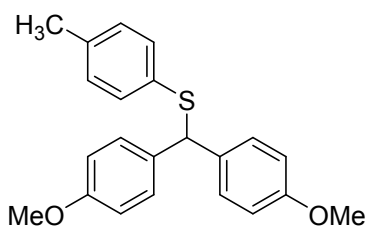

(bis(40methoxyphenyl)methyl)(p-tolyl)sulfane **3e**

Colourless oil, 92% yield. Analytical data for **3e**:  $^1\text{H}$  NMR (400 MHz,  $\text{CDCl}_3$ )  $\delta$  7.36 – 7.17 (m, 4H), 7.13 (s, 2H), 6.96 (d,  $J = 8.0$  Hz, 2H), 6.84 – 6.74 (m, 4H), 5.42 (s, 1H), 3.74 (s, 6H), 2.23 (s, 3H).  $^{13}\text{C}$  NMR (100 MHz,  $\text{CDCl}_3$ )  $\delta$  158.62, 136.60, 133.62, 132.66, 131.13, 129.52, 129.48, 113.86, 56.67, 55.26, 21.09. HRMS (ESI)  $m/z$   $[\text{M}+\text{K}]^+$ : Calcd for  $\text{C}_{22}\text{H}_{22}\text{O}_2\text{KS}$ : 389.0978. Found: 389.0980.

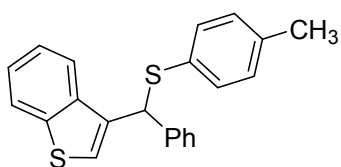

3-(phenyl(p-tolylthio)methyl)benzo[b]thiophene **3f**

Colourless oil, 99% yield. Analytical data for **3f**:  $^1\text{H}$  NMR (400 MHz,  $\text{CDCl}_3$ )  $\delta$  7.88 – 7.76 (m, 1H), 7.78 – 7.69 (m, 1H), 7.45 (d,  $J = 0.8$  Hz, 1H), 7.44 – 7.37 (m, 2H), 7.30 (m, 4H), 7.23 (m, 1H), 7.17 (m, 2H), 6.99 (d,  $J = 7.9$  Hz, 2H), 5.74 (s, 1H), 2.26 (s, 3H).  $^{13}\text{C}$  NMR (100 MHz,  $\text{CDCl}_3$ )  $\delta$  140.90, 140.11, 137.65, 137.06, 135.29, 132.22, 131.27, 129.66, 128.60, 128.51, 127.50, 125.50, 124.45, 124.06, 122.94, 122.47, 52.36, 21.10. HRMS (ESI)  $m/z$   $[\text{M}+\text{K}]^+$ : Calcd for  $\text{C}_{22}\text{H}_{18}\text{KS}_2$ : 385.0487. Found: 385.0510.

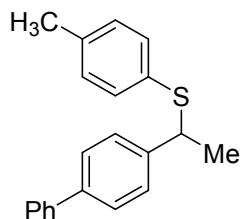

(1-([1,1'-biphenyl]-4-yl)ethyl)(p-tolyl)sulfane **3g**

Colourless oil, 95% yield. Analytical data for **3g**:  $^1\text{H}$  NMR (500 MHz,  $\text{CDCl}_3$ )  $\delta$  7.57 (d,  $J = 7.6$  Hz, 2H), 7.51 (d,  $J = 8.1$  Hz, 2H), 7.42 (t,  $J = 7.6$  Hz, 2H), 7.37 – 7.28 (m, 3H), 7.22 (d,  $J = 8.0$  Hz, 2H), 7.04 (d,  $J = 7.9$  Hz, 2H), 4.31 (q,  $J = 7.0$  Hz, 1H), 2.30 (s, 3H).  $^{13}\text{C}$  NMR (125 MHz,  $\text{CDCl}_3$ )  $\delta$  142.45, 140.83, 139.92, 137.46, 133.27, 131.23, 129.53, 128.76, 127.73, 127.22, 127.07, 127.03, 48.11, 22.15, 21.14. HRMS (ESI)  $m/z$   $[\text{M}+\text{K}]^+$ : Calcd for  $\text{C}_{21}\text{H}_{29}\text{KS}$ : 343.0923. Found: 343.1062.

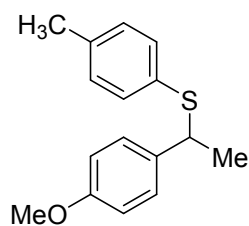

(1-(4-methoxyphenyl)ethyl)(p-tolyl)sulfane **3h**

Colourless oil, 99% yield. Analytical data for **3h**:  $^1\text{H}$  NMR (400 MHz,  $\text{CDCl}_3$ )  $\delta$  7.27 – 7.12 (m, 4H), 7.03 (d,  $J = 7.9$  Hz, 2H), 6.89 – 6.61 (m, 2H), 4.24 (q,  $J = 7.0$  Hz, 1H), 3.76 (s, 3H), 2.29 (s, 3H), 1.57 (d,  $J = 7.0$  Hz, 3H).  $^{13}\text{C}$  NMR (100 MHz,  $\text{CDCl}_3$ )  $\delta$  158.59, 137.28, 135.41, 133.18, 131.49, 129.48, 128.37,

113.72, 55.29, 47.76, 22.33, 21.15. HRMS (ESI)  $m/z$   $[M+K]^+$ : Calcd for  $C_{16}H_{18}OSK$ : 297.0715. Found: 297.0703.

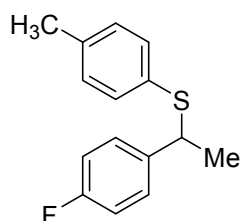

(1-(4-fluorophenyl)ethyl)(p-tolyl)sulfane **3i**

Colourless oil, 94% yield. Analytical data for **3i**:  $^1H$  NMR (400 MHz,  $CDCl_3$ )  $\delta$  7.25 – 7.07 (m, 4H), 7.03 (d,  $J = 8.0$  Hz, 2H), 6.93 (t,  $J = 8.7$  Hz, 2H), 4.24 (q,  $J = 7.0$  Hz, 1H), 2.29 (s, 3H), 1.58 (d,  $J = 7.0$  Hz, 3H).  $^{13}C$  NMR (100 MHz,  $CDCl_3$ )  $\delta$  161.75 (d,  $J = 245.2$  Hz), 139.13, 137.61, 133.43, 130.88, 129.51, 128.81 (d,  $J = 8.1$  Hz), 115.09 (d,  $J = 21.3$  Hz), 47.70, 22.21, 21.12. HRMS (ESI)  $m/z$   $[M+H]^+$ : Calcd for  $C_{16}H_{16}FS$ : 247.0957. Found: 247.0956.

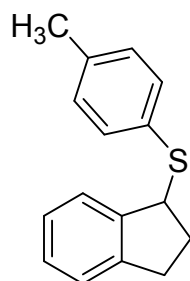

(2,3-dihydro-1H-inden-1-yl)(p-tolyl)sulfane **3j**

Colourless oil, 93% yield. Analytical data for **3j**:  $^1H$  NMR (400 MHz,  $CDCl_3$ )  $\delta$  7.35 – 7.12 (m, 6H), 7.09 (d,  $J = 8.1$  Hz, 2H), 4.68 (dd,  $J = 7.4, 4.0$  Hz, 1H), 2.99 (dt,  $J = 15.7, 7.8$  Hz, 1H), 2.82 (ddd,  $J = 15.8, 8.4, 4.4$  Hz, 1H), 2.49 (ddd,  $J = 15.8, 13.5, 7.5$  Hz, 1H), 2.33 (s, 3H), 2.18 (ddd,  $J = 17.4, 8.3, 4.2$  Hz, 1H).  $^{13}C$  NMR (100 MHz,  $CDCl_3$ )  $\delta$  143.80, 143.09, 137.05, 132.29, 132.01, 129.63, 127.68, 126.46, 124.96, 124.69, 52.43, 33.55, 30.79, 21.14. HRMS (ESI)  $m/z$   $[M+K]^+$ : Calcd for  $C_{16}H_{16}OK$ : 279.0610. Found: 279.0600.

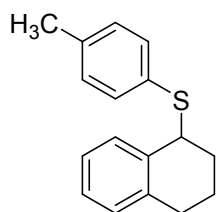

(1,2,3,4-tetrahydronaphthalen-1-yl)(p-tolyl)sulfane **3k**

Colourless oil, 95% yield. Analytical data for **3k**:  $^1\text{H}$  NMR (400 MHz,  $\text{CDCl}_3$ )  $\delta$  7.47 – 7.34 (m, 3H), 7.18 – 7.11 (m, 4H), 7.11 – 7.03 (m, 1H), 4.49 (t,  $J = 4.0$  Hz, 1H), 2.94 – 2.52 (m, 2H), 2.36 (s, 3H), 2.30 – 2.14 (m, 1H), 2.10 – 1.86 (m, 2H), 1.83 – 1.66 (m, 1H).  $^{13}\text{C}$  NMR (100 MHz,  $\text{CDCl}_3$ )  $\delta$  137.57, 137.31, 135.72, 132.79, 132.32, 130.54, 129.74, 129.25, 127.02, 125.69, 48.23, 29.16, 28.43, 21.16, 18.56. HRMS (ESI)  $m/z$   $[\text{M}+\text{K}]^+$ : Calcd for  $\text{C}_{17}\text{H}_{18}\text{KS}$ : 293.0766. Found: 293.0753.

### General procedure for alcohol arylation

To a 25ml Schlenk tube was added alcohol **1** (0.2 mmol) and **phenol** or **indole** (0.4mmol) and **B(C<sub>6</sub>F<sub>5</sub>)<sub>3</sub>** (11mg, 0.1 eq), then 1ml DCE was added. The mixture was stirred at 60 °C until the alcohol was disappeared (monitored by TLC). Then the solvent was removed and the residue was purified by silica gel column chromatography (PE:EA=100:1) to afford product **4**.

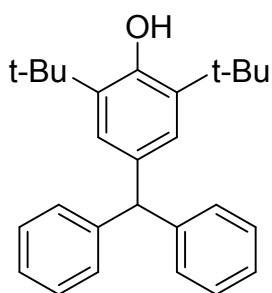

4-benzhydryl-2,6-di-tert-butylphenol **4a**

Colourless oil, 95% yield. Analytical data for **4a**:  $^1\text{H}$  NMR (400 MHz,  $\text{CDCl}_3$ )  $\delta$  7.31 – 7.22 (m, 4H), 7.18 (t,  $J = 7.3$  Hz, 2H), 7.11 (d,  $J = 7.3$  Hz, 4H), 6.90 (s, 2H), 5.44 (s, 1H), 5.07 (s, 1H), 1.35 (s, 18H).  $^{13}\text{C}$  NMR (100 MHz,  $\text{CDCl}_3$ )  $\delta$  152.09, 144.84, 135.42, 134.12, 129.43, 128.14, 126.07, 126.02, 56.83, 34.35, 30.33. HRMS (ESI)  $m/z$   $[\text{M}-\text{H}]^-$ : Calcd for  $\text{C}_{27}\text{H}_{31}\text{O}$ : 371.2375. Found: 371.2374.

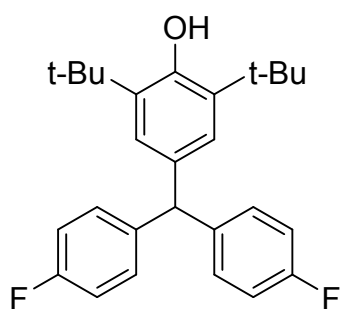

4-(bis(4-fluorophenyl)methyl)-2,6-di-tert-butylphenol **4b**

Colourless oil, 93% yield. Analytical data for **4b**:  $^1\text{H NMR}$  (400 MHz,  $\text{CDCl}_3$ )  $\delta$  7.04 (dd,  $J = 8.5, 5.6$  Hz, 4H), 6.96 (t,  $J = 8.7$  Hz, 4H), 6.84 (s, 2H), 5.40 (s, 1H), 5.11 (s, 1H), 1.36 (s, 18H).  $^{13}\text{C NMR}$  (100 MHz,  $\text{CDCl}_3$ )  $\delta$  161.36 (d,  $J = 244.6$  Hz), 152.28, 140.39, 135.67, 133.86, 130.72 (d,  $J = 7.9$  Hz), 125.83, 115.01 (d,  $J = 21.1$  Hz), 55.23, 34.37, 30.31.  $^{19}\text{F NMR}$  (376 MHz,  $\text{CDCl}_3$ )  $\delta$  -117.08. HRMS (ESI)  $m/z$  [M-H] $^-$ : Calcd for  $\text{C}_{27}\text{H}_{29}\text{F}_2\text{O}$ : 407.2186. Found: 407.2179.

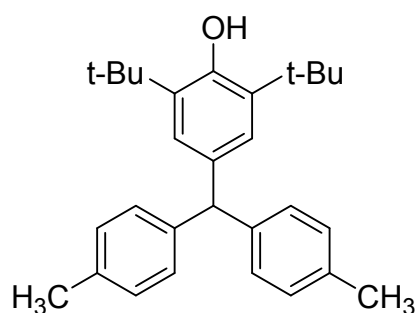

2,6-di-tert-butyl-4-(di-p-tolylmethyl)phenol **4c**

Colourless oil, 98% yield. Analytical data for **4c**:  $^1\text{H NMR}$  (400 MHz,  $\text{CDCl}_3$ )  $\delta$  7.06 (d,  $J = 8.0$  Hz, 4H), 6.99 (d,  $J = 8.1$  Hz, 4H), 6.92 (s, 2H), 5.35 (s, 1H), 5.05 (s, 1H), 2.30 (s, 6H), 1.35 (s, 18H).  $^{13}\text{C NMR}$  (100 MHz,  $\text{CDCl}_3$ )  $\delta$  152.03, 142.15, 135.37, 135.36, 134.50, 129.25, 128.84, 126.02, 56.16, 34.38, 30.39, 21.07. HRMS (ESI)  $m/z$  [M-H] $^-$ : Calcd for  $\text{C}_{29}\text{H}_{35}\text{O}$ : 399.2688. Found: 399.2694.

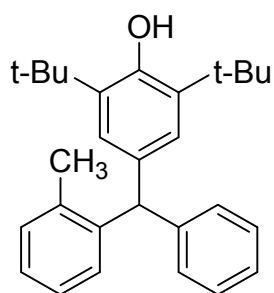

2,6-di-tert-butyl-4-(phenyl(o-tolyl)methyl)phenol **4d**

Colourless oil, 98% yield. Analytical data for **4d**:  $^1\text{H NMR}$  (500 MHz,  $\text{CDCl}_3$ )  $\delta$  7.25 (m, 2H), 7.21 – 6.98 (m, 6H), 6.82 (m, 3H), 5.56 (s, 1H), 5.06 (s, 1H), 2.22 (s, 3H), 1.34 (s, 18H).  $^{13}\text{C NMR}$  (100 MHz,  $\text{CDCl}_3$ )  $\delta$  152.02, 144.18, 143.28, 136.60, 135.40, 133.67, 130.27, 129.54, 129.31, 128.12, 126.29, 126.09, 125.95, 125.63, 53.46, 34.35, 30.37, 20.06. HRMS (ESI)  $m/z$   $[\text{M}-\text{H}]^-$ : Calcd for  $\text{C}_{28}\text{H}_{33}\text{O}$ : 385.2531. Found: 385.2538.

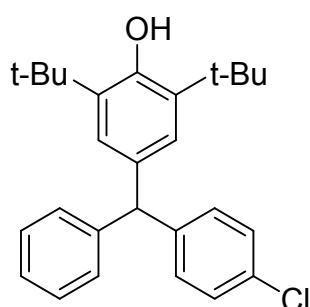

2,6-di-tert-butyl-4-((4-chlorophenyl)(phenyl)methyl)phenol **4e**

Colourless oil, 91% yield. Analytical data for **4e**:  $^1\text{H NMR}$  (400 MHz,  $\text{CDCl}_3$ )  $\delta$  7.38 – 7.14 (m, 5H), 7.06 (dd,  $J = 19.1, 7.8$  Hz, 4H), 6.87 (s, 2H), 5.41 (s, 1H), 5.10 (s, 1H), 1.35 (s, 18H).  $^{13}\text{C NMR}$  (100 MHz,  $\text{CDCl}_3$ )  $\delta$  152.26, 144.26, 143.47, 135.61, 133.65, 131.80, 130.77, 129.33, 128.27, 126.27, 125.94, 56.19, 34.37, 30.32. HRMS (ESI)  $m/z$   $[\text{M}-\text{H}]^-$ : Calcd for  $\text{C}_{27}\text{H}_{30}\text{ClO}$ : 405.1985. Found: 405.1981.

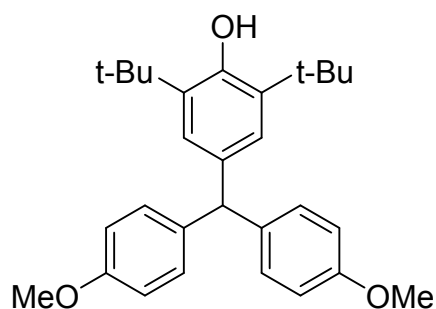

4-(bis(4-methoxyphenyl)methyl)-2,6-di-tert-butylphenol **4f**

Colourless oil, 99% yield. Analytical data for **4f**:  $^1\text{H NMR}$  (400 MHz,  $\text{CDCl}_3$ )  $\delta$  6.94 (d,  $J = 8.6$  Hz, 4H), 6.82 (s, 2H), 6.73 (d,  $J = 8.7$  Hz, 4H), 5.26 (s, 1H), 4.98 (s, 1H), 3.71 (s, 6H), 1.28 (s, 18H).  $^{13}\text{C NMR}$  (100 MHz,  $\text{CDCl}_3$ )  $\delta$  156.69, 150.92, 136.38, 134.32, 133.72, 129.17, 124.83, 112.41, 54.18, 54.12, 33.29, 29.30. HRMS (ESI)  $m/z$   $[\text{M}+\text{Na}]^+$ : Calcd for  $\text{C}_{29}\text{H}_{36}\text{O}_3\text{Na}$ : 455.2562. Found: 455.2557.

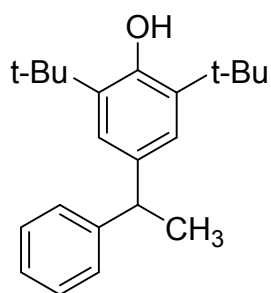

2,6-di-tert-butyl-4-(1-phenylethyl)phenol **4g**

Colorless oil, 92% yield. Analytical data for **4g**:  $^1\text{H NMR}$  (500 MHz,  $\text{CDCl}_3$ )  $\delta$  7.30 (dd,  $J = 20.3, 12.9$  Hz, 4H), 7.20 (t,  $J = 7.1$  Hz, 1H), 7.06 (s, 2H), 5.06 (s, 1H), 4.10 (q,  $J = 7.2$  Hz, 1H), 1.66 (d,  $J = 7.3$  Hz, 3H), 1.45 (s, 18H).  $^{13}\text{C NMR}$  (125 MHz,  $\text{CDCl}_3$ )  $\delta$  151.91, 147.10, 136.78, 135.57, 128.24, 127.58, 125.77, 124.11, 44.83, 34.39, 30.37, 22.40. HRMS (ESI)  $m/z$   $[\text{M}-\text{H}]^-$ : Calcd for  $\text{C}_{22}\text{H}_{29}\text{O}$ : 309.2218. Found: 309.2218.

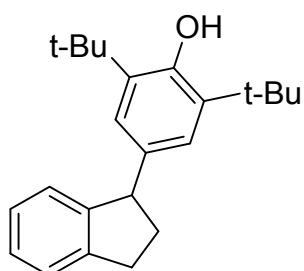



2,6-di-tert-butyl-4-(2,3-dihydro-1H-inden-1-yl)phenol **4h**

Colorless oil, 91% yield. Analytical data for **4h**:  $^1\text{H NMR}$  (400 MHz,  $\text{CDCl}_3$ )  $\delta$  7.35 – 7.21 (m, 1H), 7.21 – 7.06 (m, 2H), 6.99 (d,  $J = 7.4$  Hz, 3H), 5.07 (s, 1H), 4.24 (t,  $J = 8.3$  Hz, 1H), 3.02 (dd,  $J = 18.9, 8.4$  Hz, 1H), 2.98 – 2.84 (m, 1H), 2.64 – 2.42 (m, 1H), 2.04 (td,  $J = 17.9, 8.9$  Hz, 1H), 1.41 (s, 18H).  $^{13}\text{C NMR}$  (100 MHz,  $\text{CDCl}_3$ )  $\delta$  152.17, 147.37, 144.25, 135.69, 135.49, 126.26, 126.15, 124.91, 124.58, 124.26, 51.64, 36.74, 34.38, 31.81, 30.40. HRMS (ESI)  $m/z$  [M-H] $^-$ : Calcd for  $\text{C}_{23}\text{H}_{29}\text{O}$ : 321.2218. Found: 321.2208.

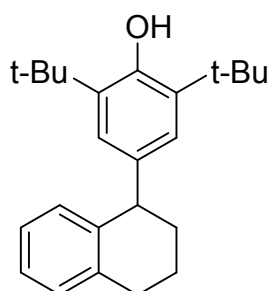

2,6-di-tert-butyl-4-(1,2,3,4-tetrahydronaphthalen-1-yl)phenol **4i**

Colorless oil, 94% yield. Analytical data for **4i**:  $^1\text{H NMR}$  (400 MHz,  $\text{CDCl}_3$ )  $\delta$  7.13 – 7.05 (m, 2H), 7.05 – 6.95 (m, 1H), 6.86 (d,  $J = 6.7$  Hz, 3H), 5.04 (s, 1H), 4.09 – 3.86 (m, 1H), 3.01 – 2.56 (m, 2H), 2.13 (ddd,  $J = 12.2, 10.6, 4.8$  Hz, 1H), 1.96 – 1.69 (m, 3H), 1.39 (s, 18H).  $^{13}\text{C NMR}$  (100 MHz,  $\text{CDCl}_3$ )  $\delta$  151.84, 140.16, 137.82, 137.42, 135.35, 130.10, 128.77, 125.63, 125.43, 125.36, 45.63, 34.34, 33.26, 30.42, 29.82, 21.33. HRMS (ESI)  $m/z$  [M-H] $^-$ : Calcd for  $\text{C}_{24}\text{H}_{31}\text{O}$ : 335.2375. Found: 335.2371.

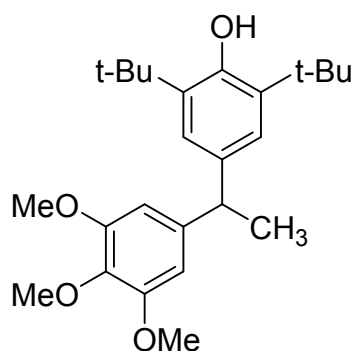

2,6-di-tert-butyl-4-(1-(3,4,5-trimethoxyphenyl)ethyl)phenol **4j**

Colourless oil, 91% yield. Analytical data for **4j**:  $^1\text{H NMR}$  (500 MHz,  $\text{CDCl}_3$ )  $\delta$  7.05 (s, 2H), 6.47 (s, 2H), 5.07 (s, 1H), 3.99 (q,  $J = 7.2$  Hz, 1H), 3.82 (s, 9H), 1.60 (d,  $J = 7.2$  Hz, 3H), 1.42 (s, 18H).  $^{13}\text{C NMR}$  (125 MHz,  $\text{CDCl}_3$ )  $\delta$  152.95, 152.02, 142.74, 136.44, 136.06, 135.55, 123.98, 104.64, 60.88, 56.05, 45.15, 34.42, 30.36, 22.79. HRMS (ESI)  $m/z$   $[\text{M}+\text{H}]^+$ : Calcd for  $\text{C}_{25}\text{H}_{37}\text{O}_4$ : 401.2692. Found: 401.2691.

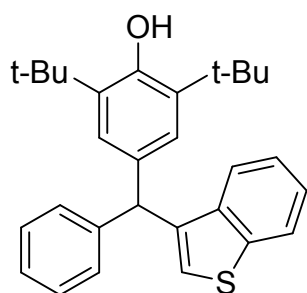

#### 4-(benzo[*b*]thiophen-3-yl(phenyl)methyl)-2,6-di-tert-butylphenol **4k**

Yellow oil, 88% yield. Analytical data for **4k**:  $^1\text{H NMR}$  (400 MHz,  $\text{CDCl}_3$ )  $\delta$  7.83 (d,  $J = 7.9$  Hz, 1H), 7.49 (d,  $J = 7.8$  Hz, 1H), 7.35 – 7.11 (m, 7H), 6.96 (s, 2H), 6.74 (s, 1H), 5.65 (s, 1H), 5.09 (s, 1H), 1.35 (s, 18H).  $^{13}\text{C NMR}$  (100 MHz,  $\text{CDCl}_3$ )  $\delta$  152.30, 143.22, 140.68, 140.10, 138.68, 135.61, 133.23, 128.99, 128.34, 126.34, 125.69, 124.70, 124.11, 123.81, 122.86, 122.71, 51.35, 34.35, 30.34. HRMS (ESI)  $m/z$   $[\text{M}-\text{H}]^-$ : Calcd for  $\text{C}_{29}\text{H}_{31}\text{OS}$ : 427.2096. Found: 427.2094.

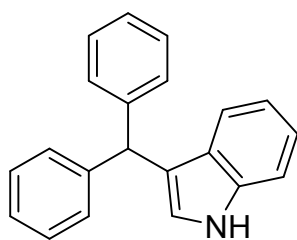

#### 3-benzhydryl-1H-indole **4l**

Colourless oil, 88% yield. Analytical data for **4l**:  $^1\text{H NMR}$  (400 MHz,  $\text{CDCl}_3$ )  $\delta$  7.83 (br, 1H), 7.30 – 7.04 (m, 13H), 6.91 (t,  $J = 7.5$  Hz, 1H), 6.47 (d,  $J = 1.4$  Hz, 1H), 5.59 (s, 1H).  $^{13}\text{C NMR}$  (100 MHz,  $\text{CDCl}_3$ )  $\delta$  142.88, 135.65, 127.96, 127.23, 125.94, 125.18, 123.01, 121.06, 118.88, 118.35, 109.99, 98.93, 47.76. HRMS (ESI)  $m/z$   $[\text{M}+\text{H}]^+$ : Calcd for  $\text{C}_{21}\text{H}_{18}\text{N}$ : 284.1439. Found: 284.1445.

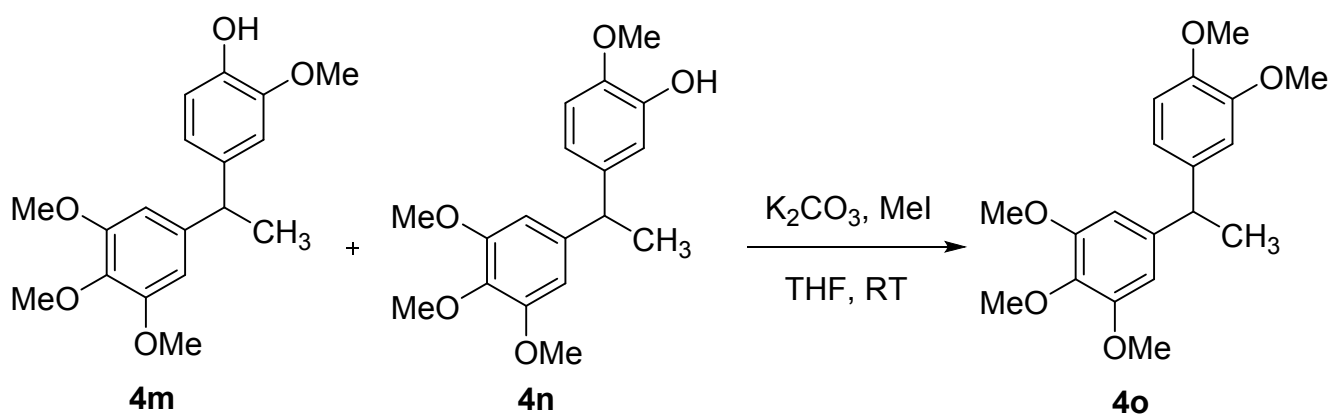

To a solution of **4m** and **4n** in THF was added  $\text{K}_2\text{CO}_3$  (2 equiv) and MeI (2.5 equiv), and the reaction was stirred at room temperature until the starting compounds were disappeared. Then 30ml water was added to the solution and extracted with EA. And the extracts were evaporated, then the residue was purified by silica gel column chromatography to afford **4o**.

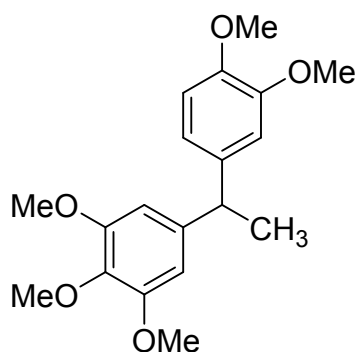

5-(1-(3,4-dimethoxyphenyl)ethyl)-1,2,3-trimethoxybenzene **4o**

Colorless oil, 92% yield. Analytical data for **4o**:  $^1\text{H}$  NMR (400 MHz,  $\text{CDCl}_3$ )  $\delta$  6.72 (dt,  $J = 8.3, 5.0$  Hz, 2H), 6.66 (d,  $J = 1.6$  Hz, 1H), 6.35 (s, 2H), 3.96 (q,  $J = 7.2$  Hz, 1H), 3.79 (s, 3H), 3.77 (s, 3H), 3.75 (s, 3H), 3.74 (s, 6H), 1.53 (d,  $J = 7.2$  Hz, 3H).  $^{13}\text{C}$  NMR (100 MHz,  $\text{CDCl}_3$ )  $\delta$  152.01, 147.73, 146.35, 141.31, 137.72, 135.18, 118.23, 110.12, 109.99, 103.59, 59.81, 55.05, 54.85, 43.53, 21.25. HRMS (ESI)  $m/z$   $[\text{M}-\text{H}]^-$ : Calcd for  $\text{C}_{19}\text{H}_{24}\text{O}_5\text{Na}$ : 355.1521. Found: 355.1510.

# NMR Spectra

## 2a <sup>1</sup>H NMR

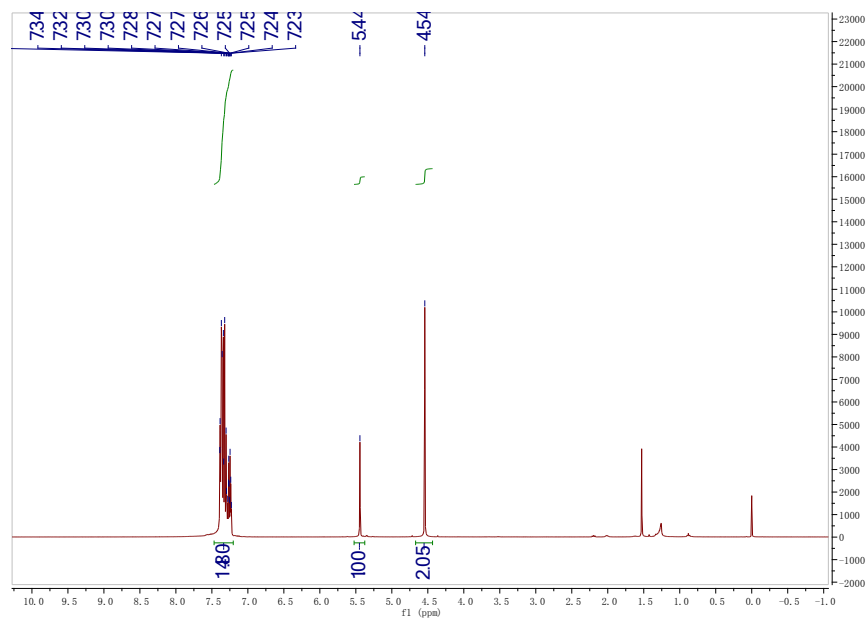

## 2a <sup>13</sup>C NMR

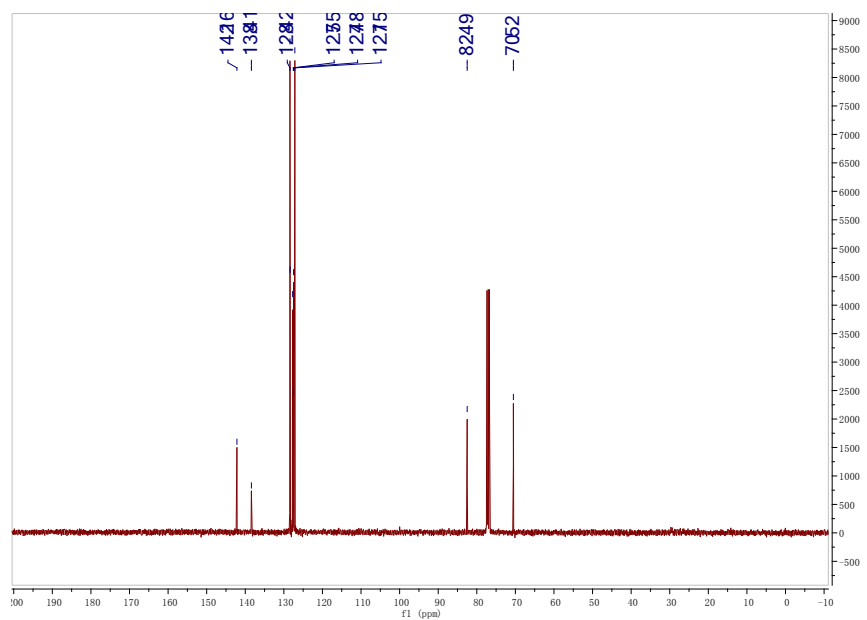

## 2b <sup>1</sup>H NMR

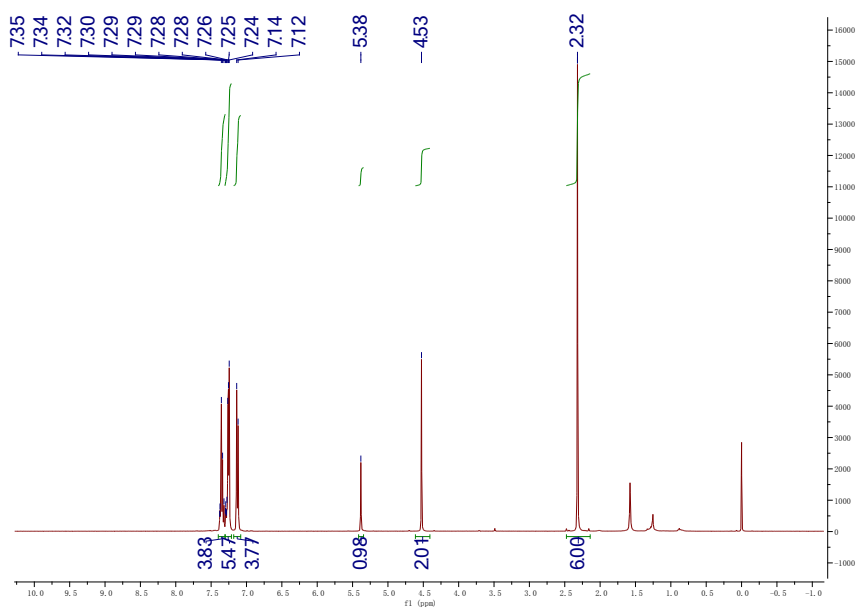

## 2b <sup>13</sup>C NMR

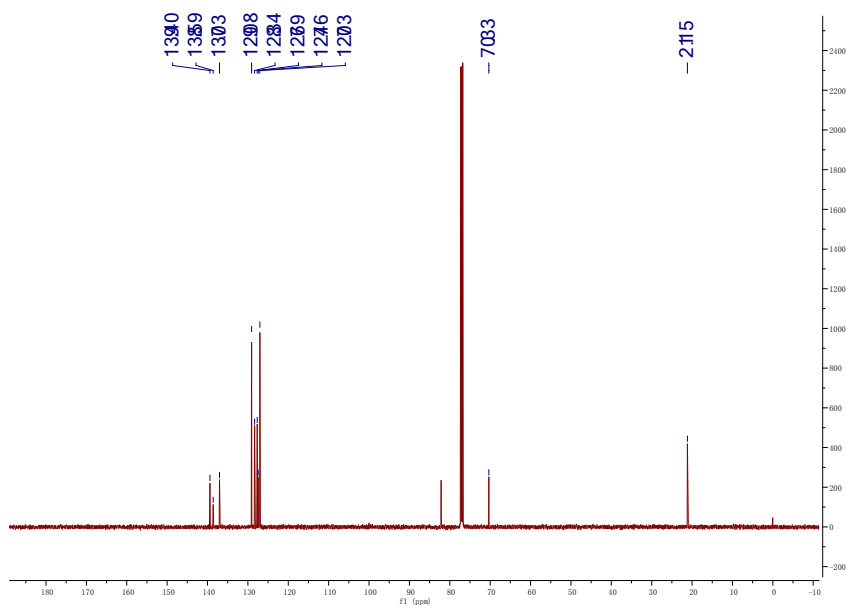

## 2c <sup>1</sup>H NMR

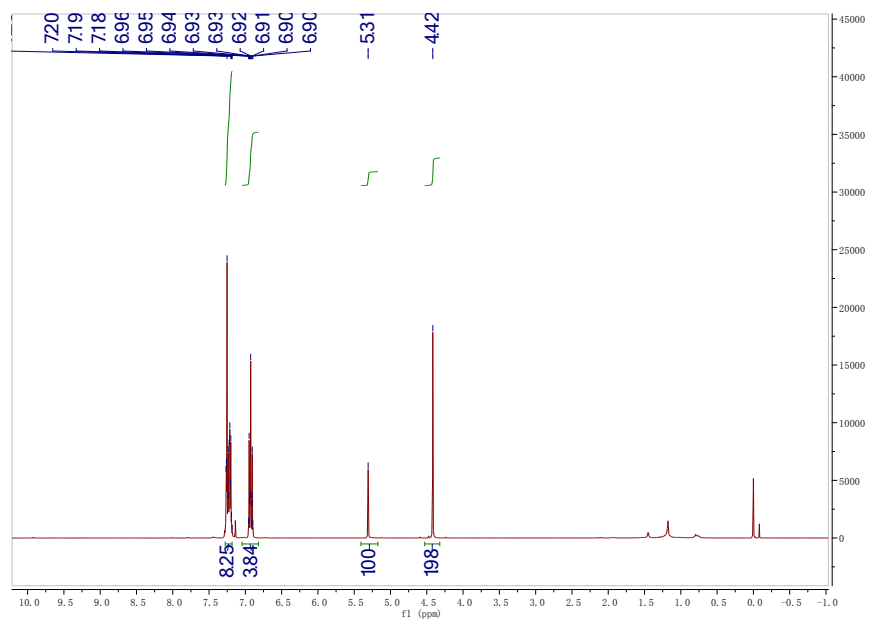

## 2c <sup>13</sup>C NMR

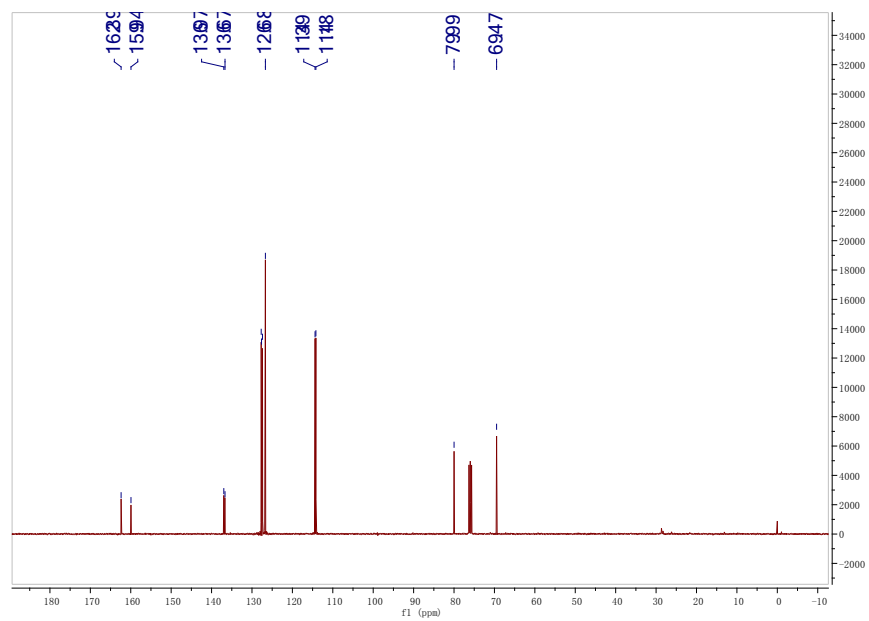

## 2c $^{19}\text{F}$ NMR

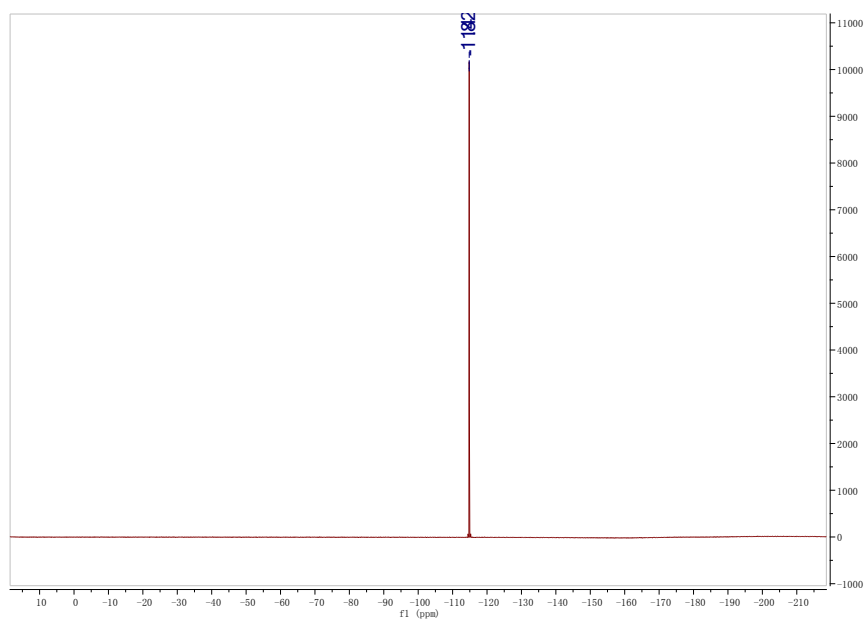

## 2d <sup>1</sup>H NMR

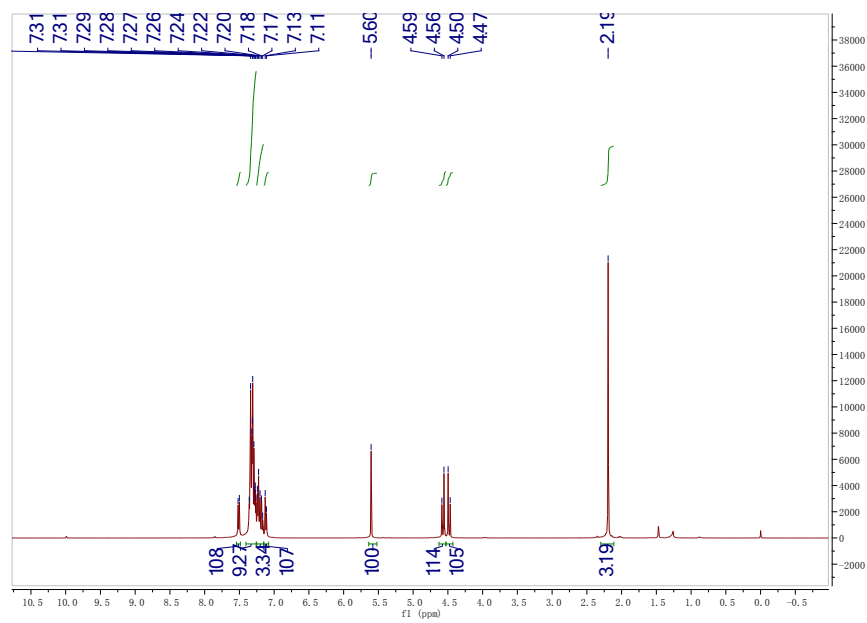

## 2d <sup>13</sup>C NMR

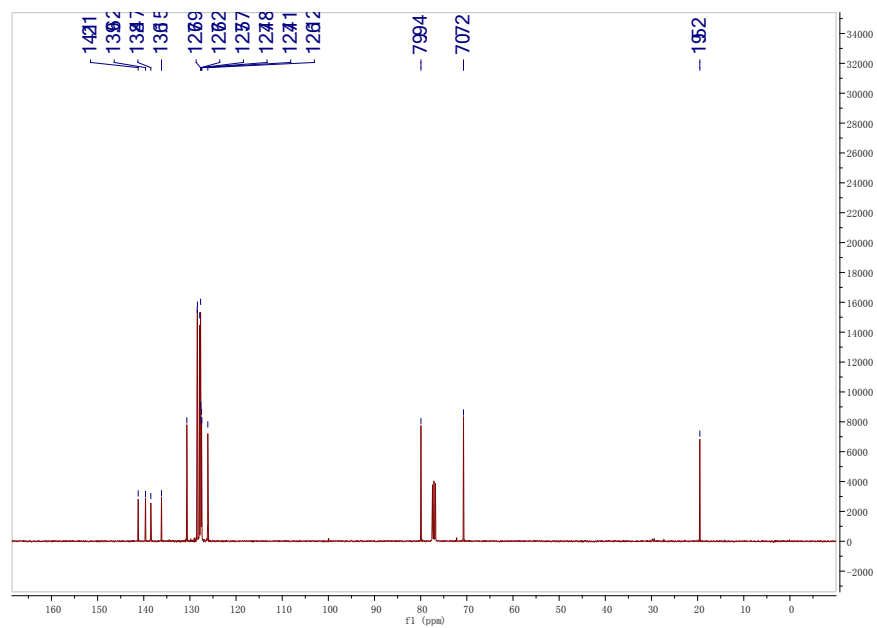



## 2e <sup>1</sup>H NMR

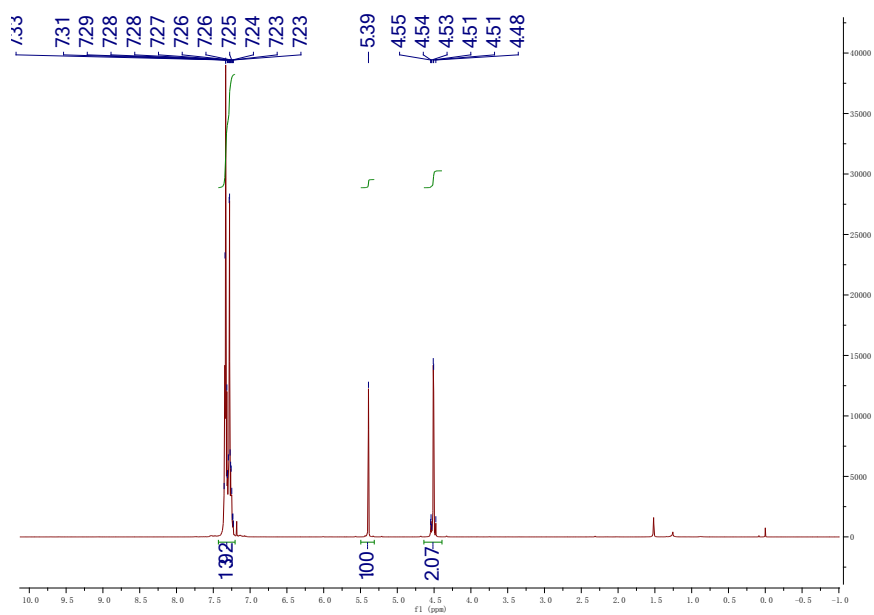

## 2e <sup>13</sup>C NMR

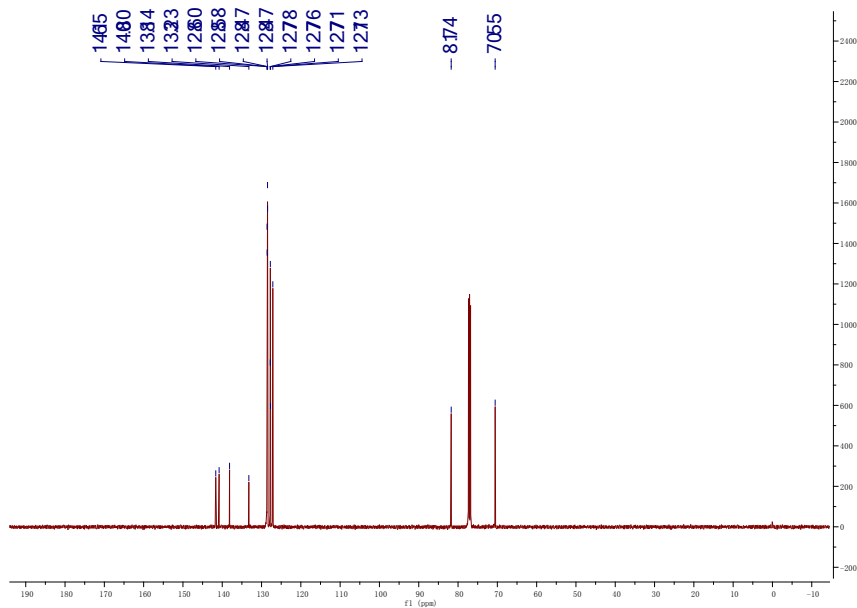

## 2f <sup>1</sup>H NMR

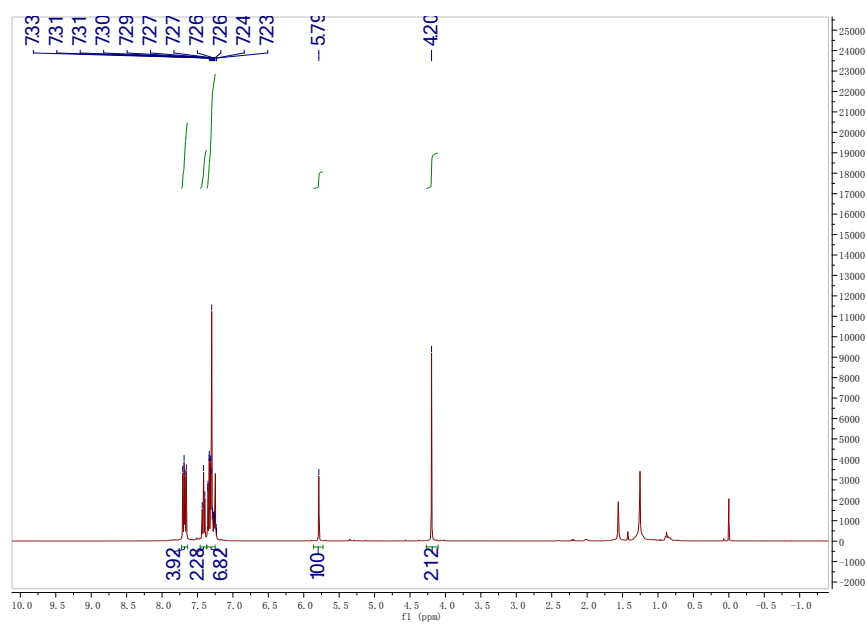

## 2f <sup>13</sup>C NMR

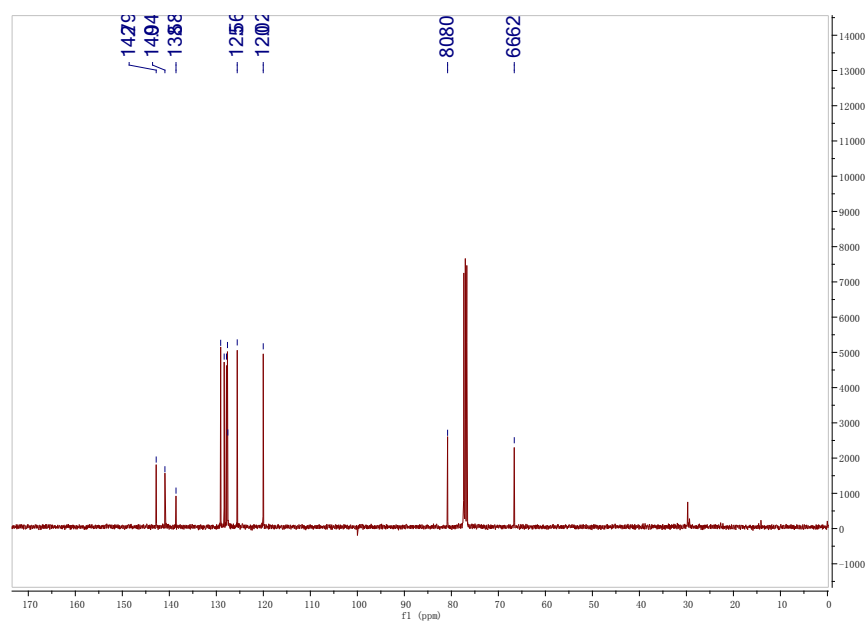

## 2g <sup>1</sup>H NMR

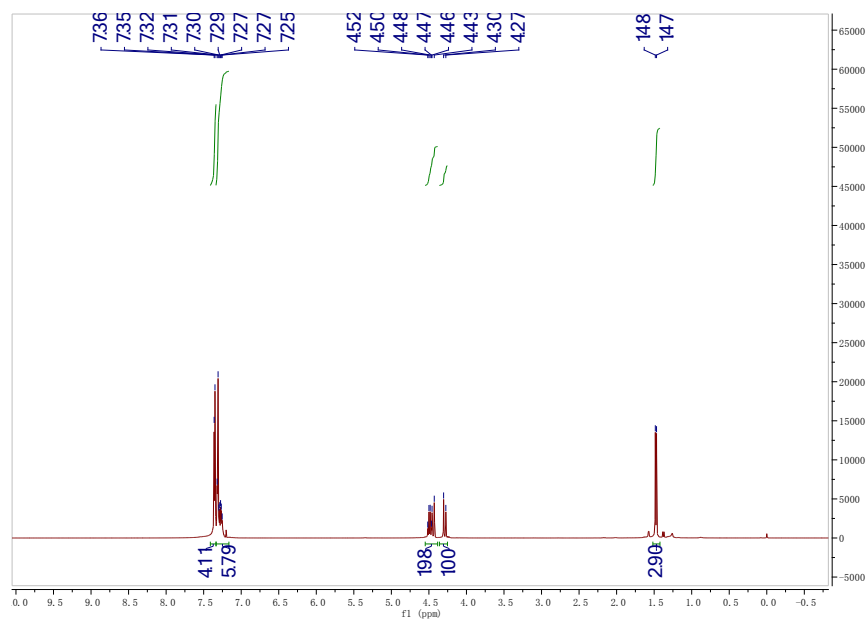

## 2g <sup>13</sup>C NMR

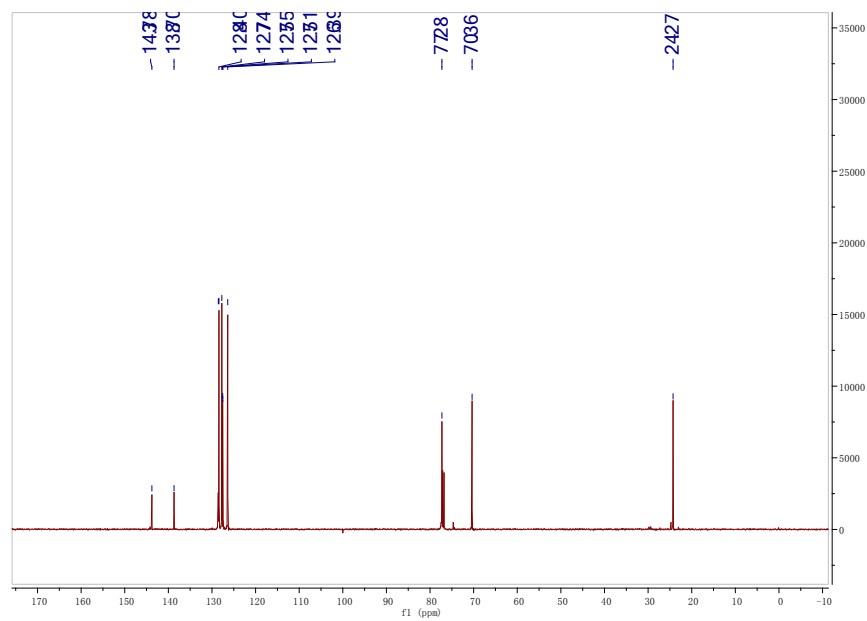

## 2h <sup>1</sup>H NMR

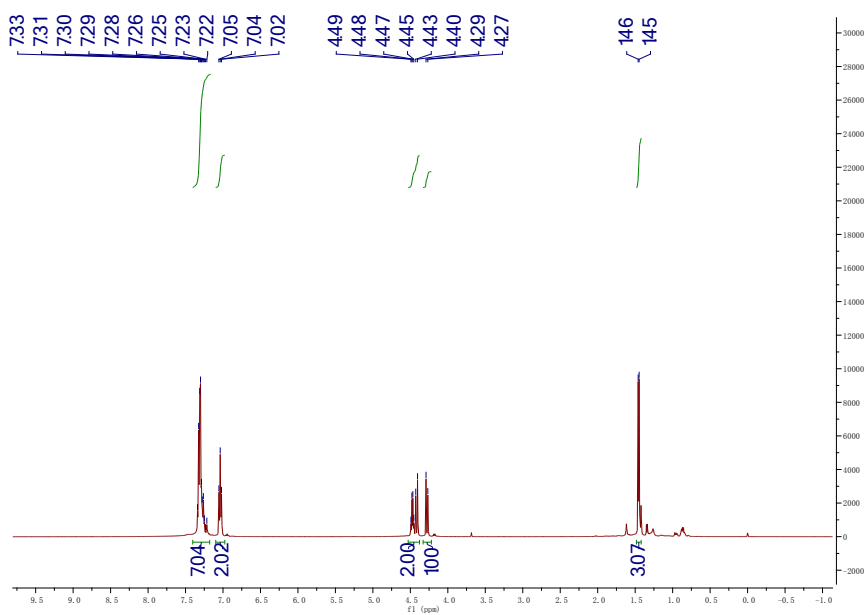

## 2h <sup>13</sup>C NMR

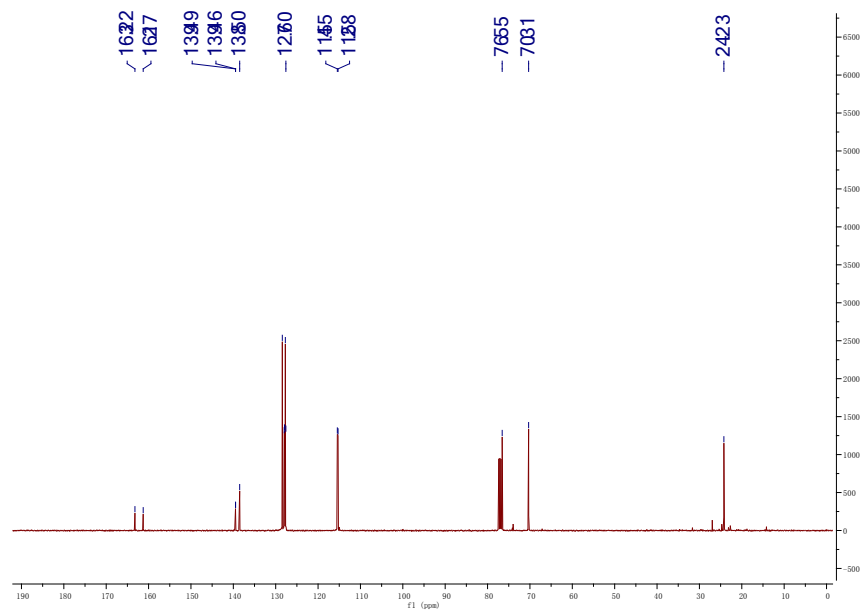

# 2h <sup>19</sup>F NMR

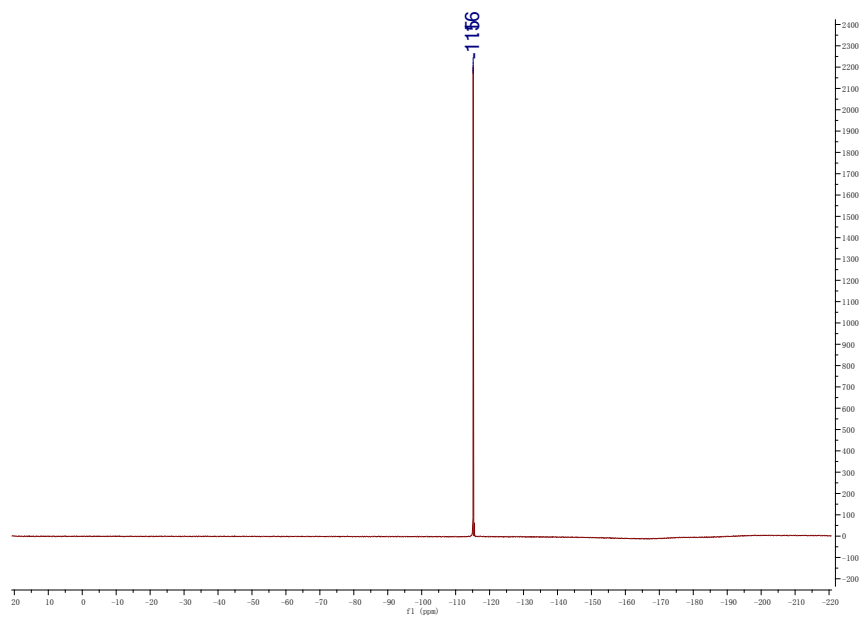

## 2i <sup>1</sup>H NMR

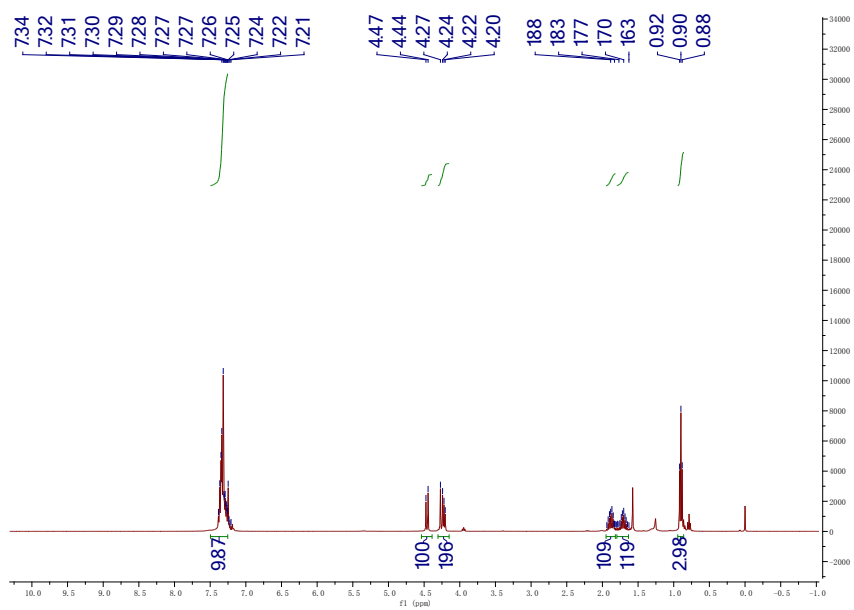

## 2i <sup>13</sup>C NMR

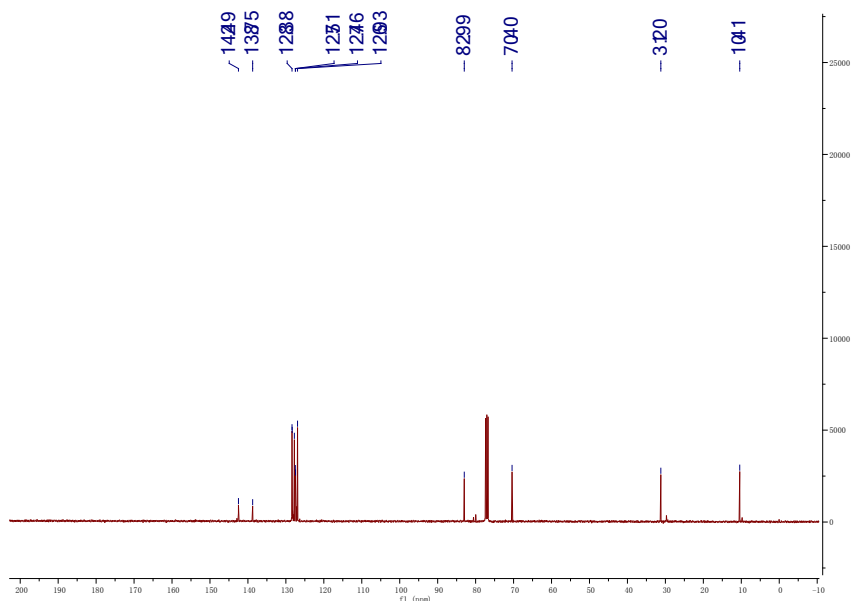

## 2j <sup>1</sup>H NMR

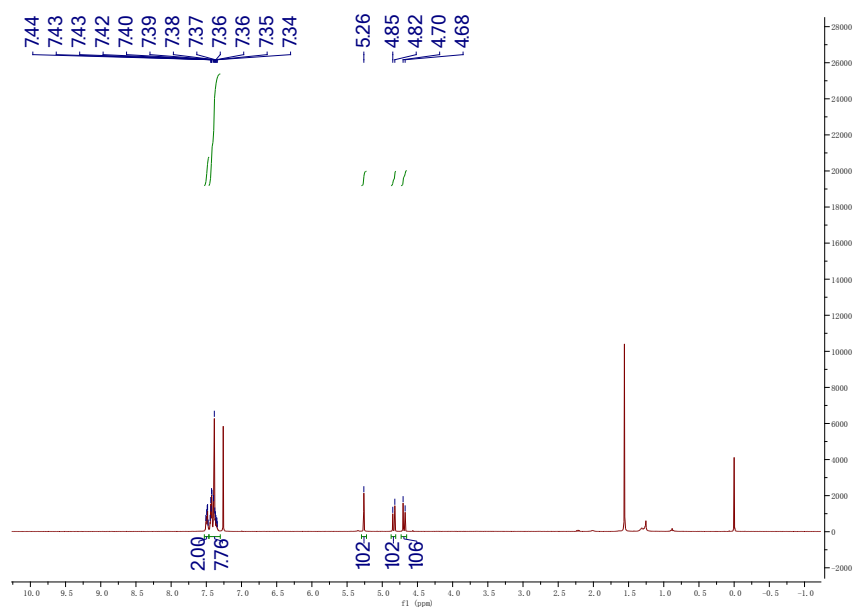

## 2j <sup>13</sup>C NMR

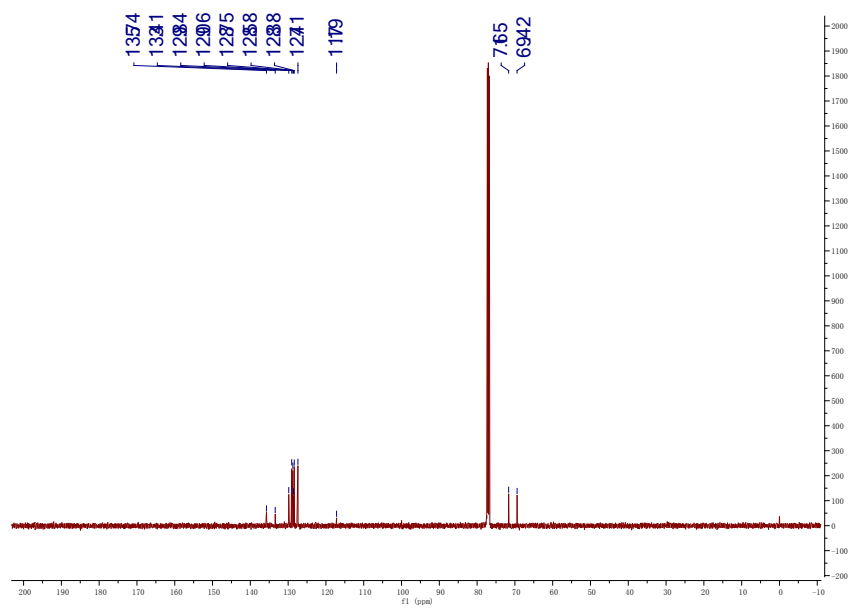

## 2k <sup>1</sup>H NMR

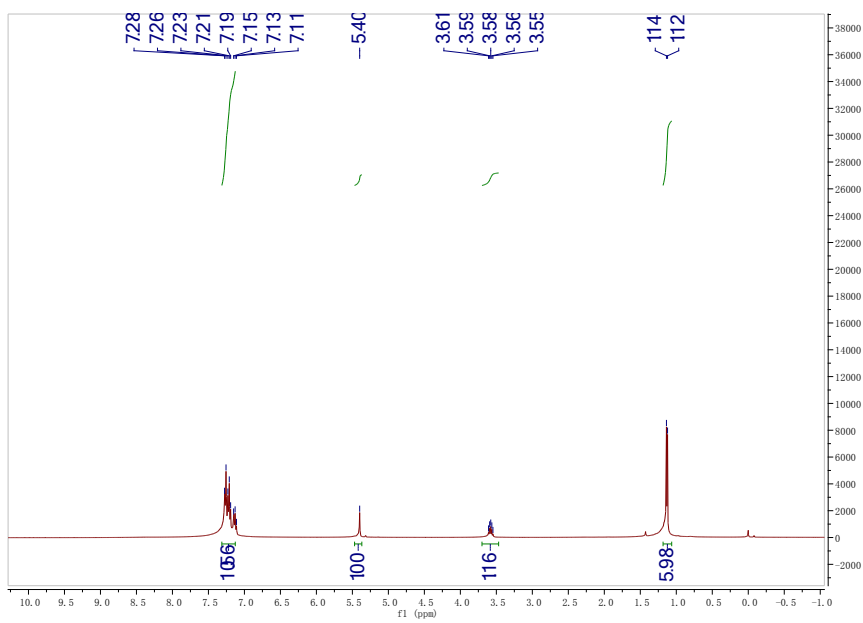

## 2k <sup>13</sup>C NMR

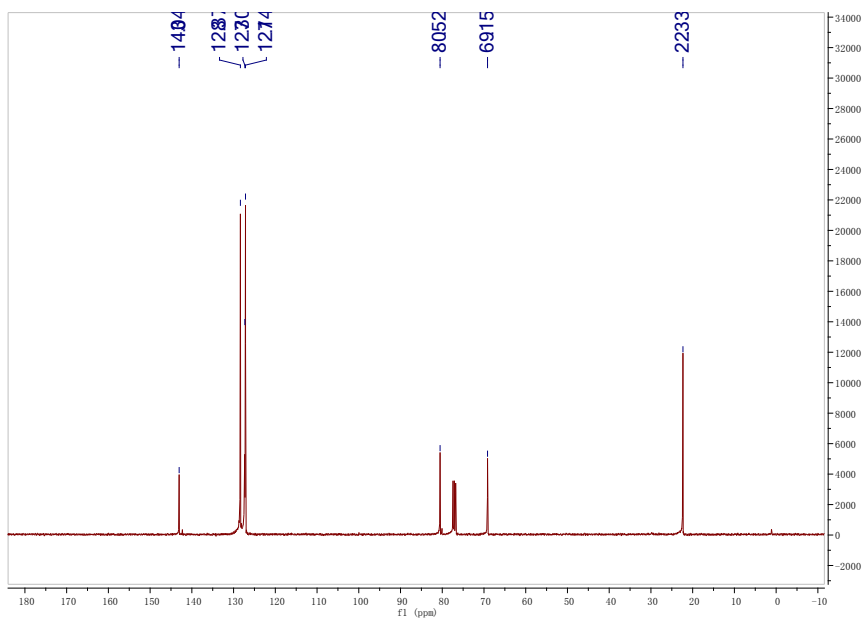



## 2I <sup>1</sup>H NMR

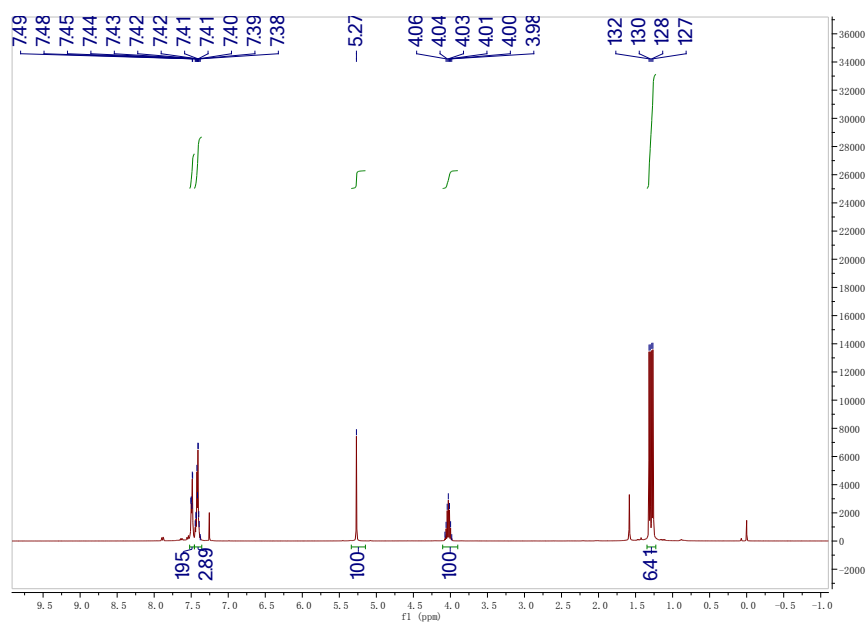

## 2I <sup>13</sup>C NMR

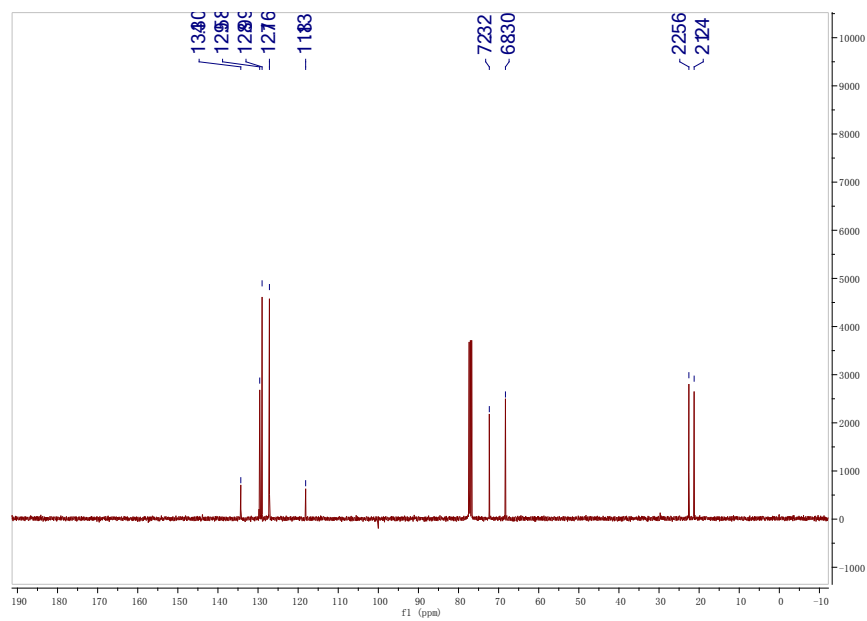

## 2m <sup>1</sup>H NMR

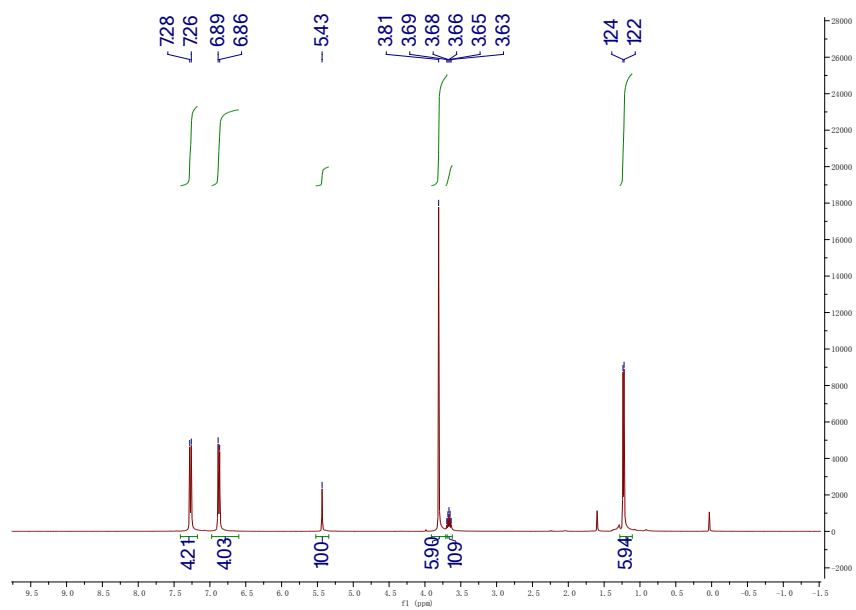

## 2m <sup>13</sup>C NMR

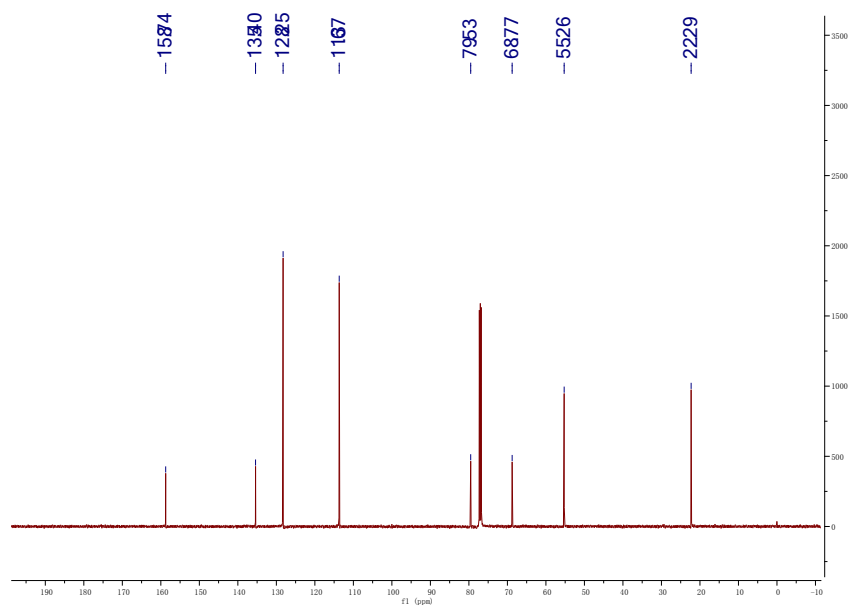

## 2n <sup>1</sup>H NMR

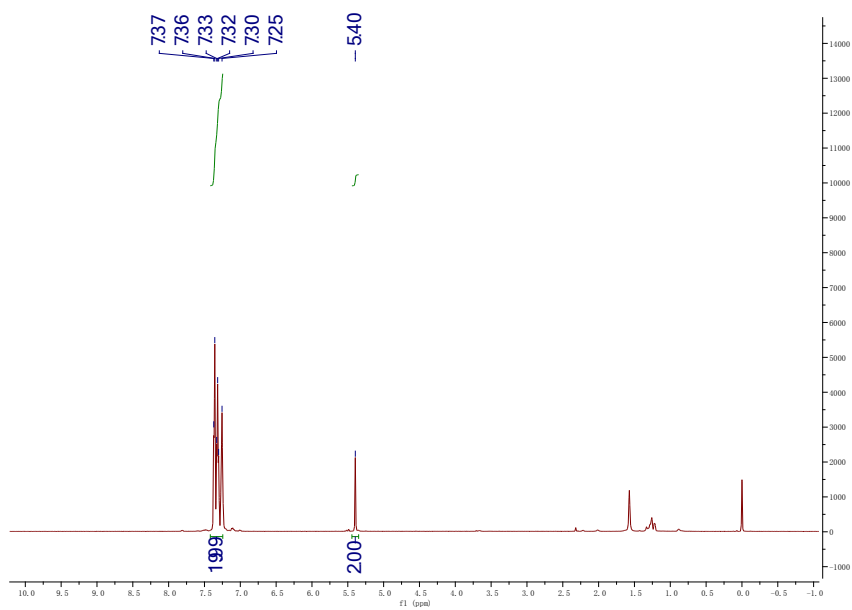

## 2n <sup>13</sup>C NMR

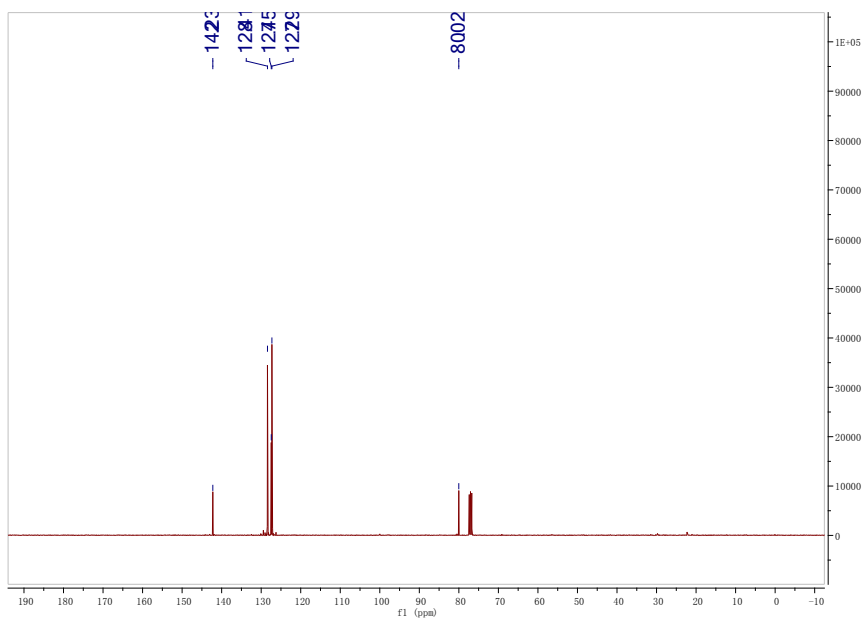

### 3a <sup>1</sup>H NMR

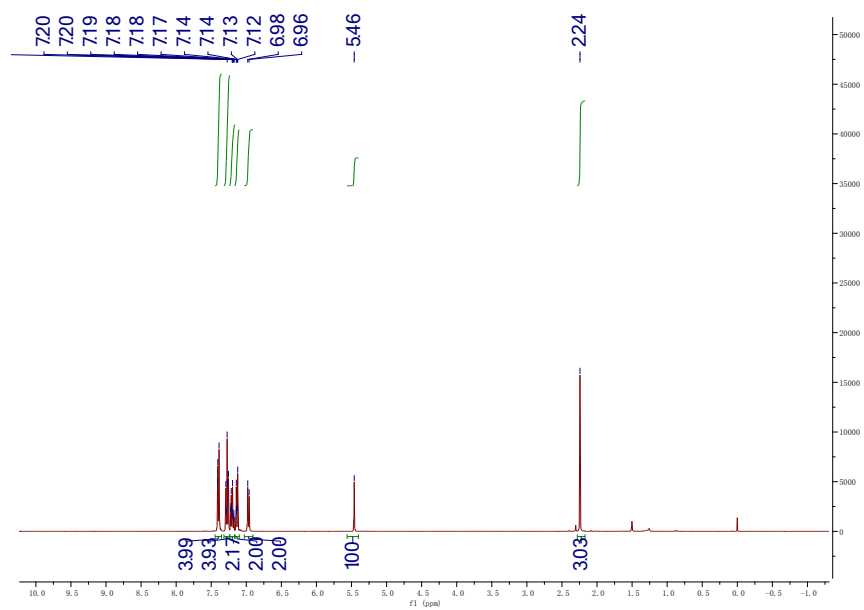

### 3a <sup>13</sup>C NMR

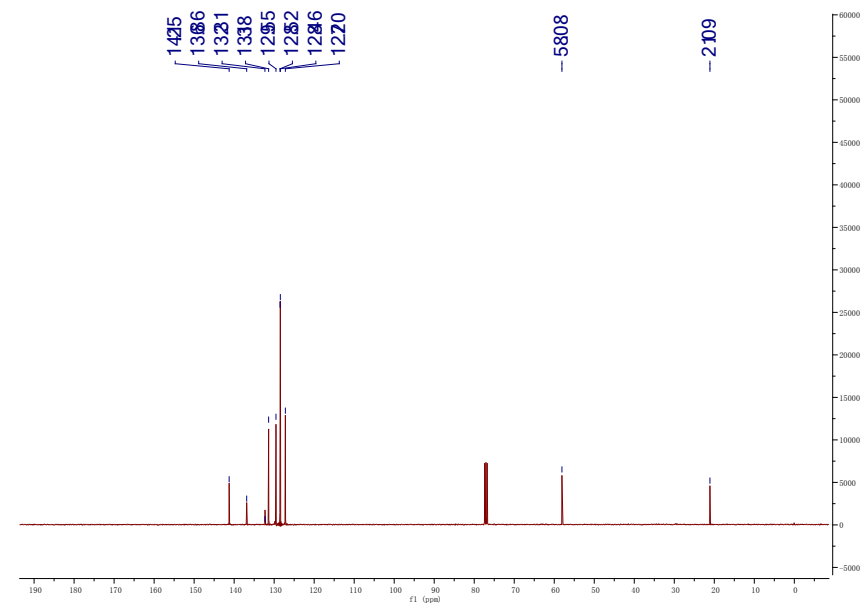

### 3b <sup>1</sup>H NMR

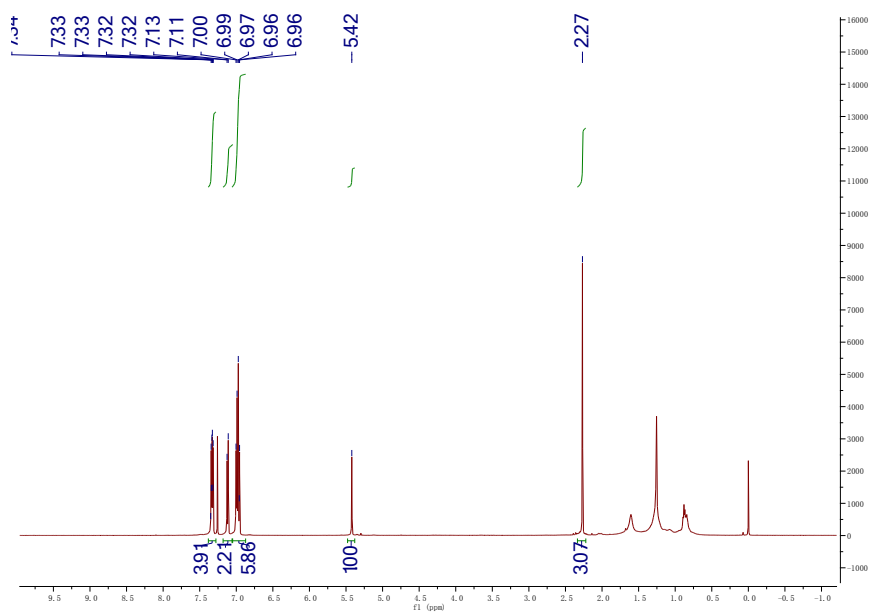

### 3b <sup>13</sup>C NMR

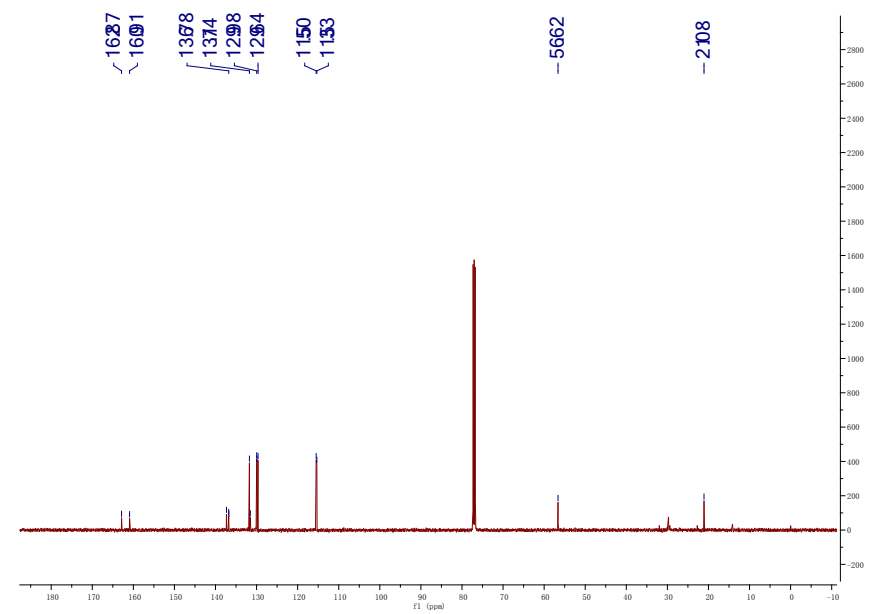

# 3b <sup>19</sup>F NMR

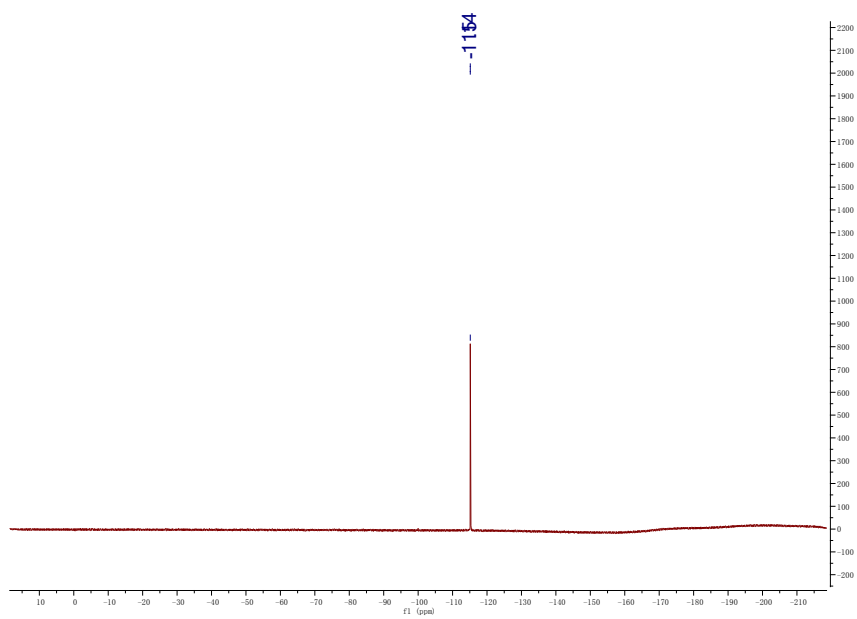

### 3c <sup>1</sup>H NMR

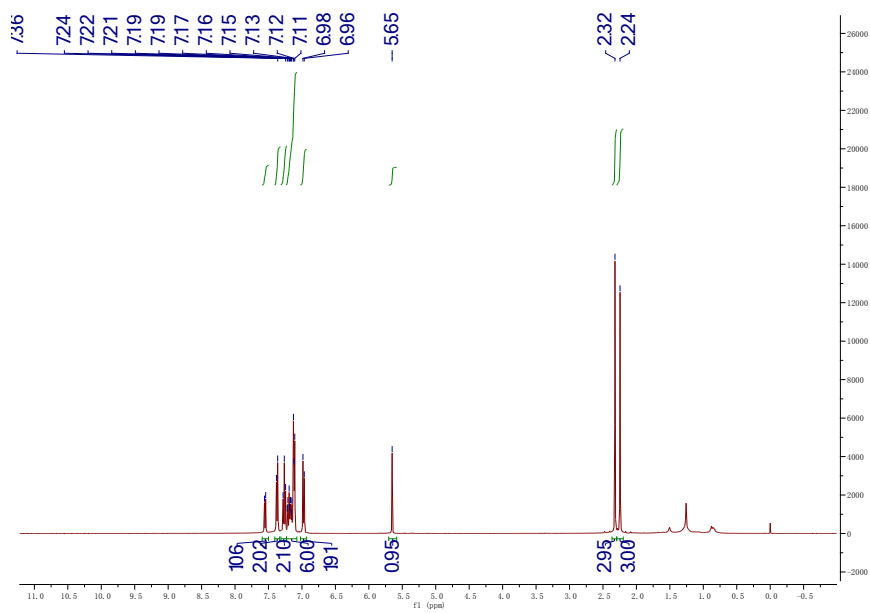

### 3c <sup>13</sup>C NMR

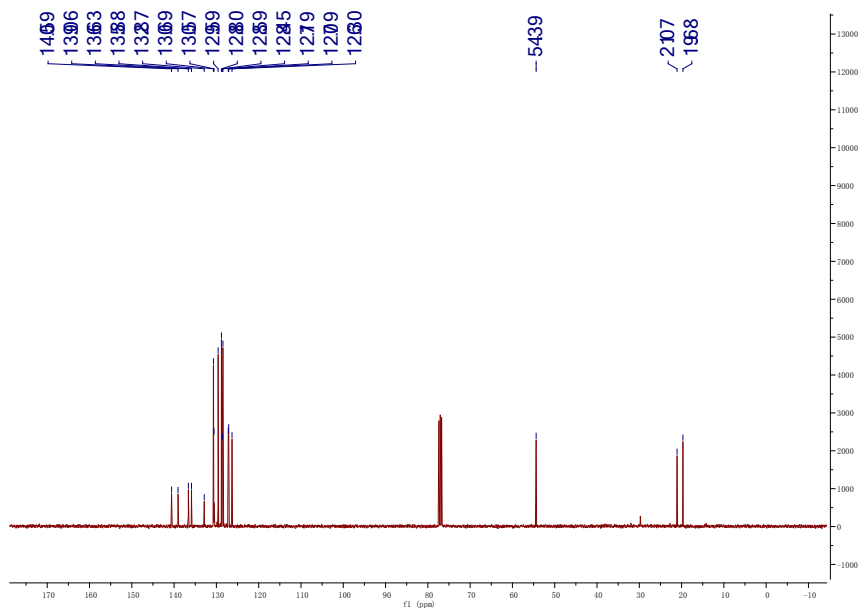

### 3d <sup>1</sup>H NMR

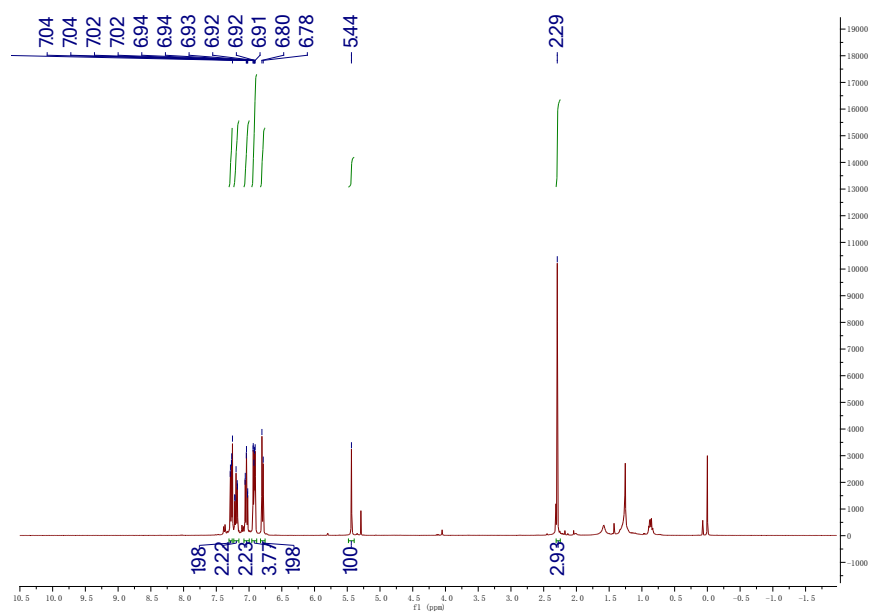

### 3d <sup>13</sup>C NMR

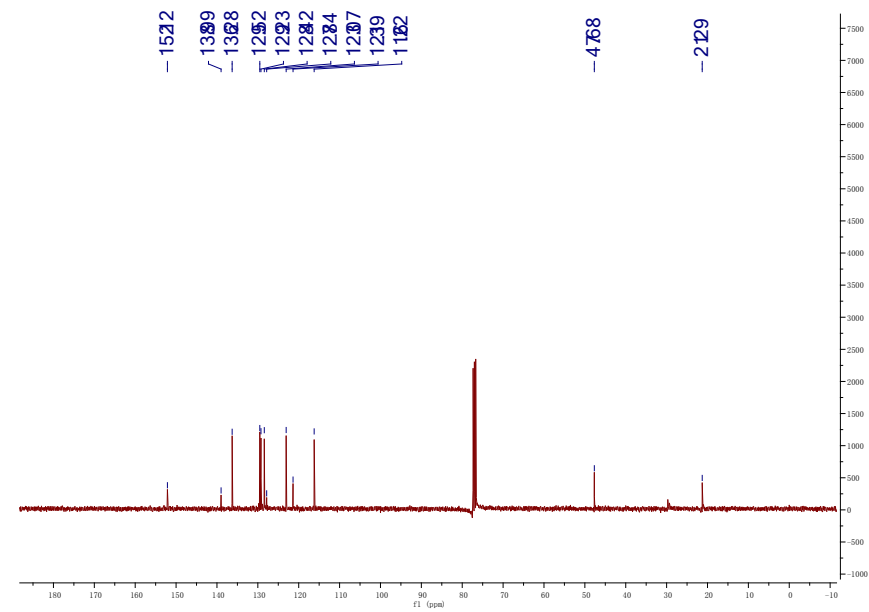



### 3e <sup>1</sup>H NMR

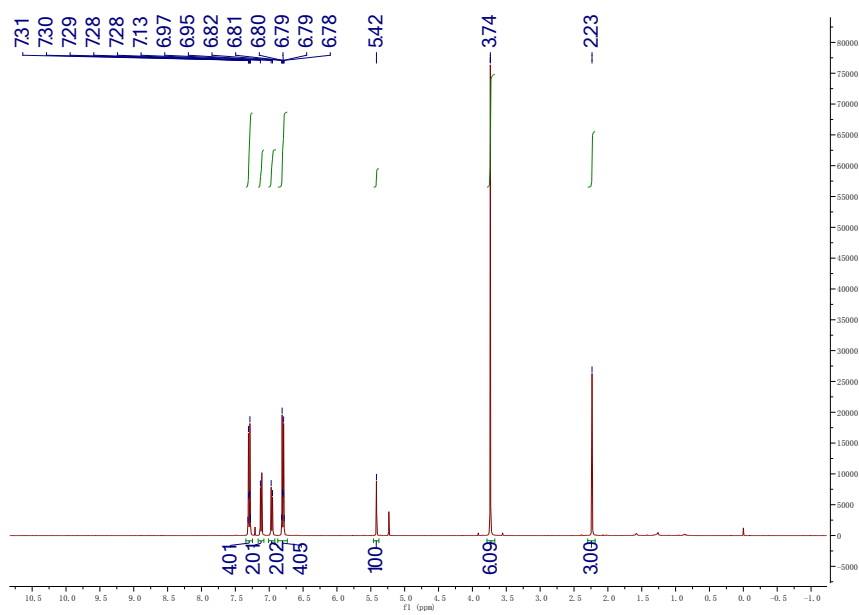

### 3e <sup>13</sup>C NMR

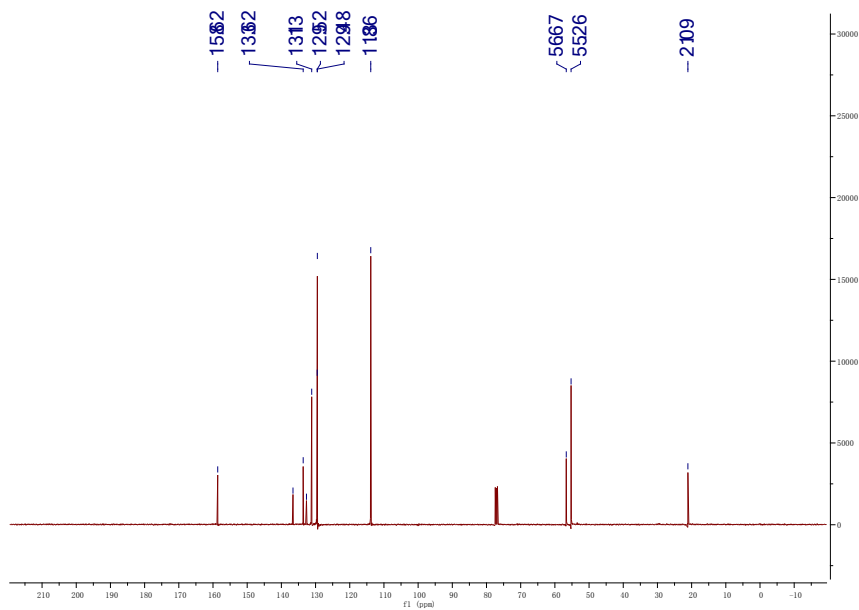

### 3f <sup>1</sup>H NMR

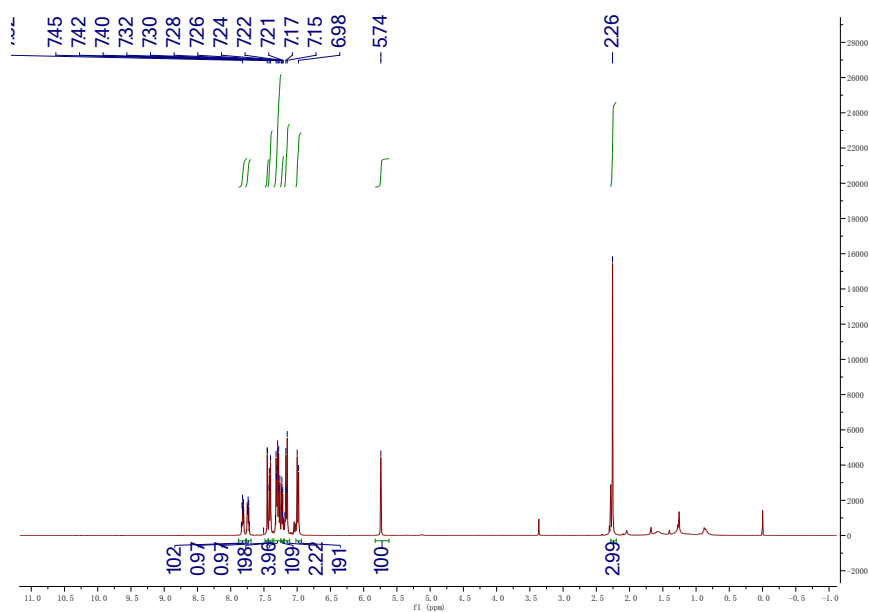

### 3f <sup>13</sup>C NMR

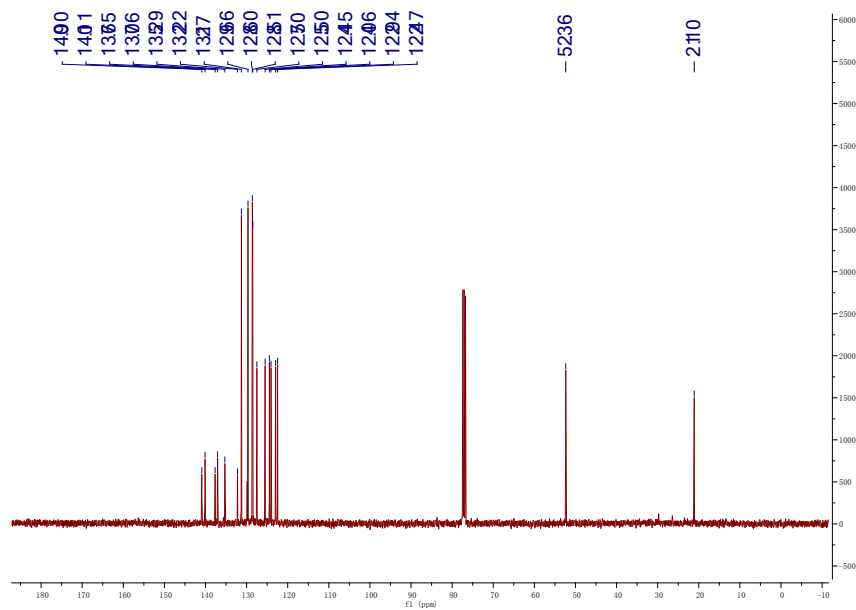

### 3g <sup>1</sup>H NMR

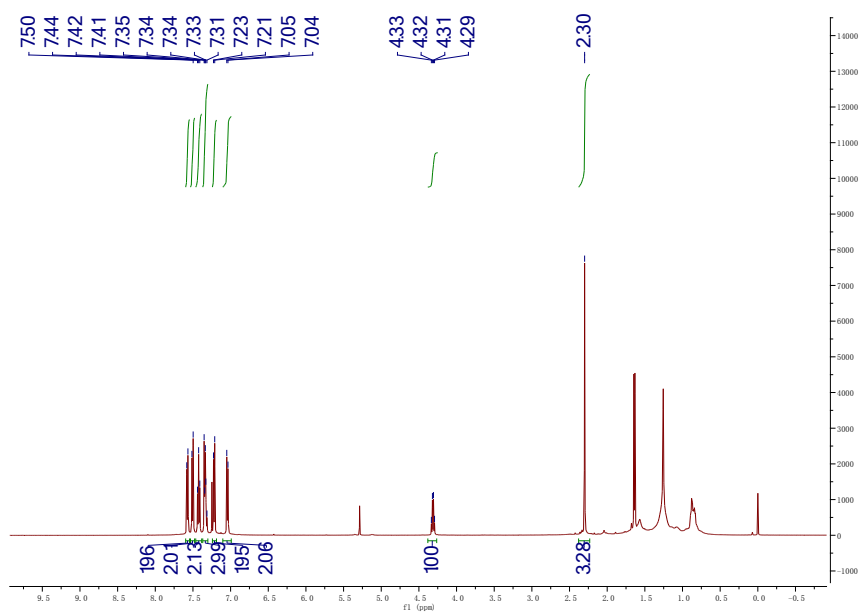

### 3g <sup>13</sup>C NMR

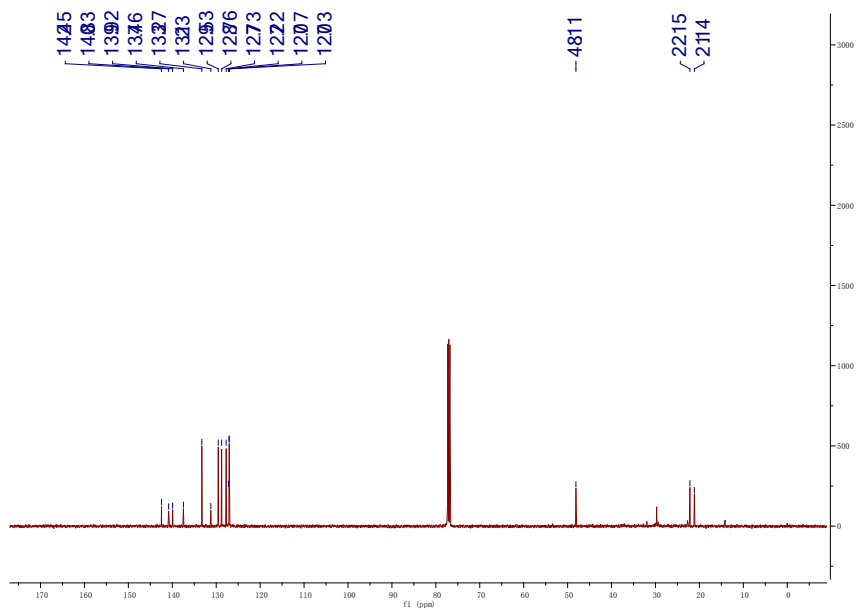

### 3h <sup>1</sup>H NMR

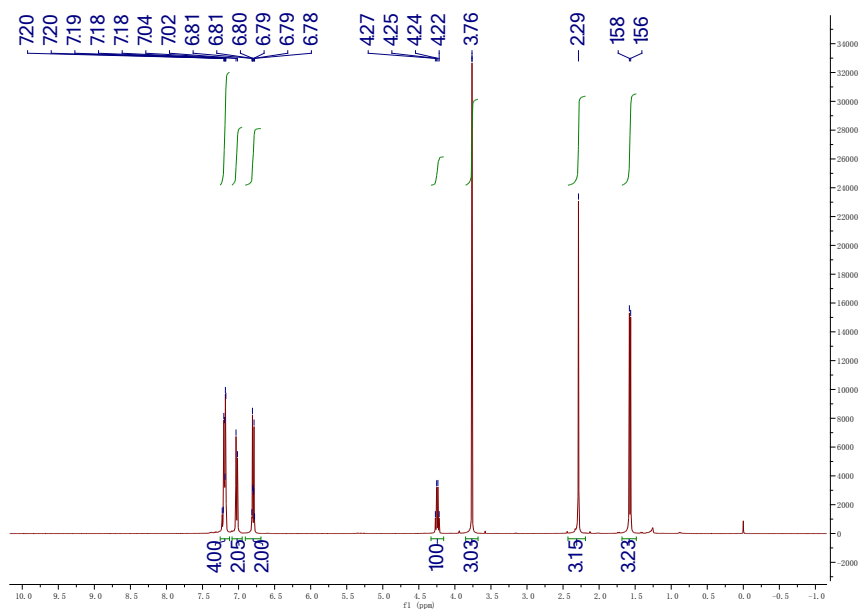

### 3h <sup>13</sup>C NMR

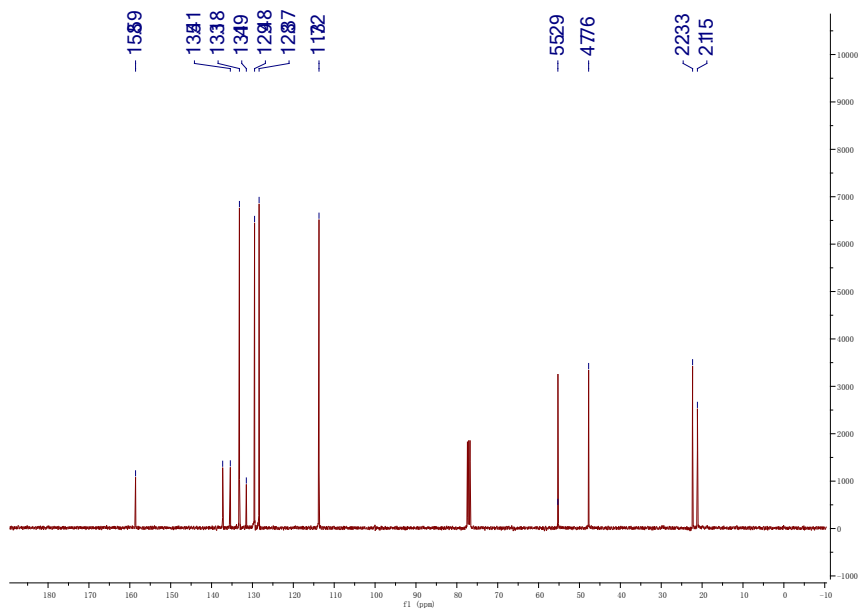

### 3i <sup>1</sup>H NMR

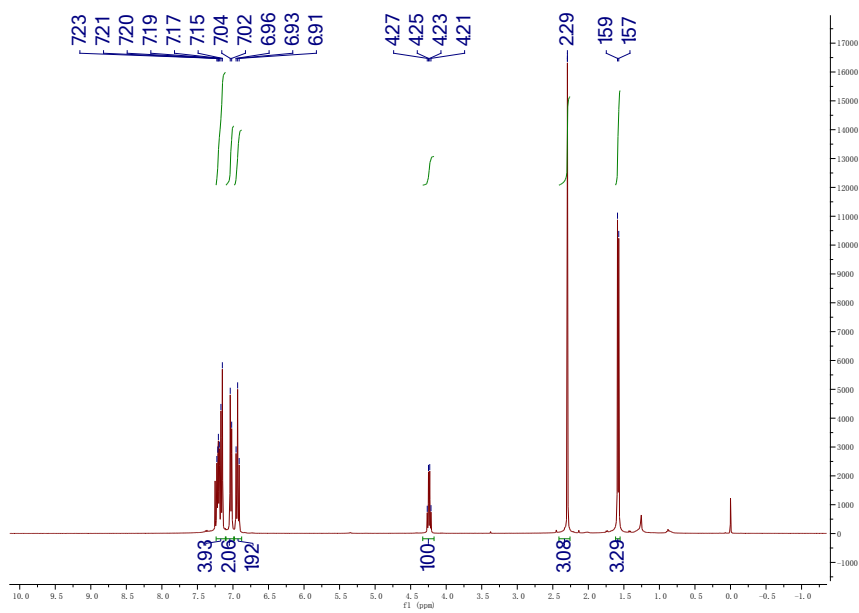

### 3i <sup>13</sup>C NMR

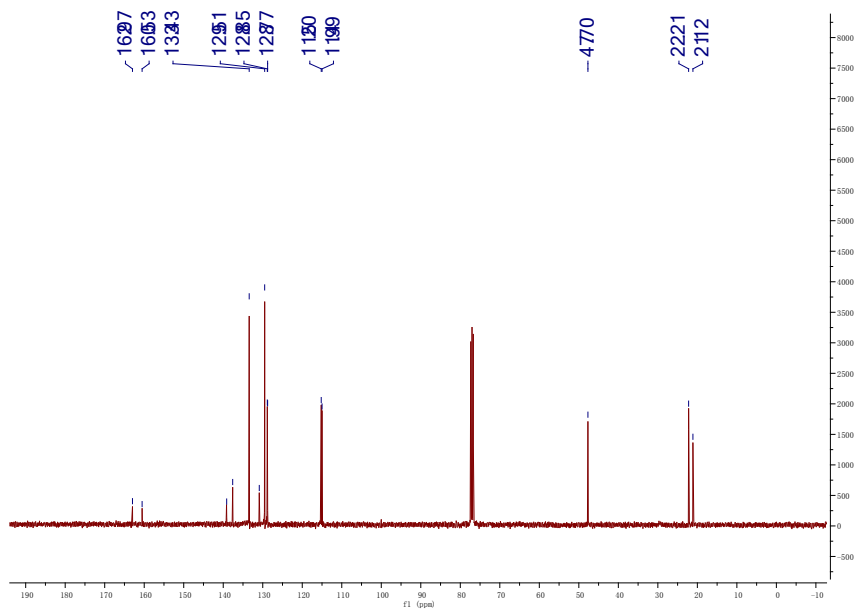

# 3i <sup>19</sup>F NMR

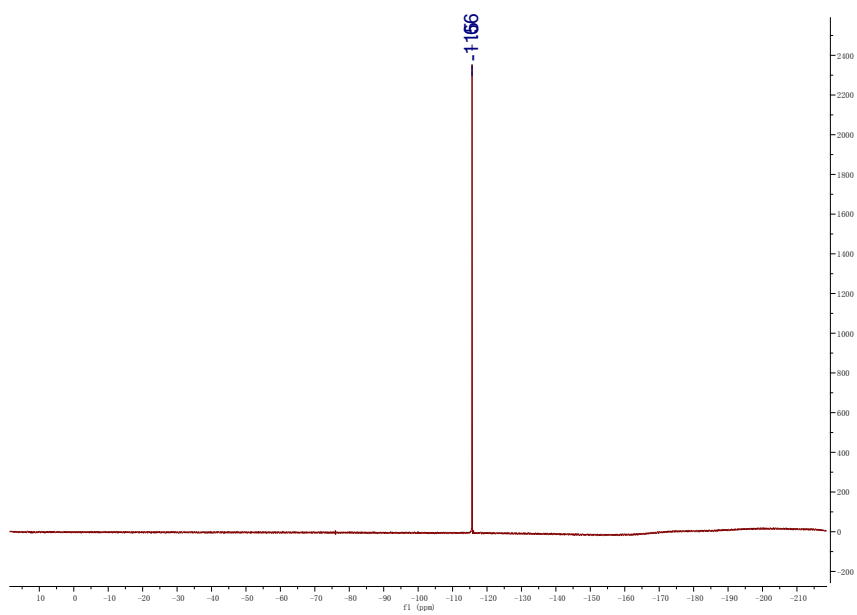

### 3j <sup>1</sup>H NMR

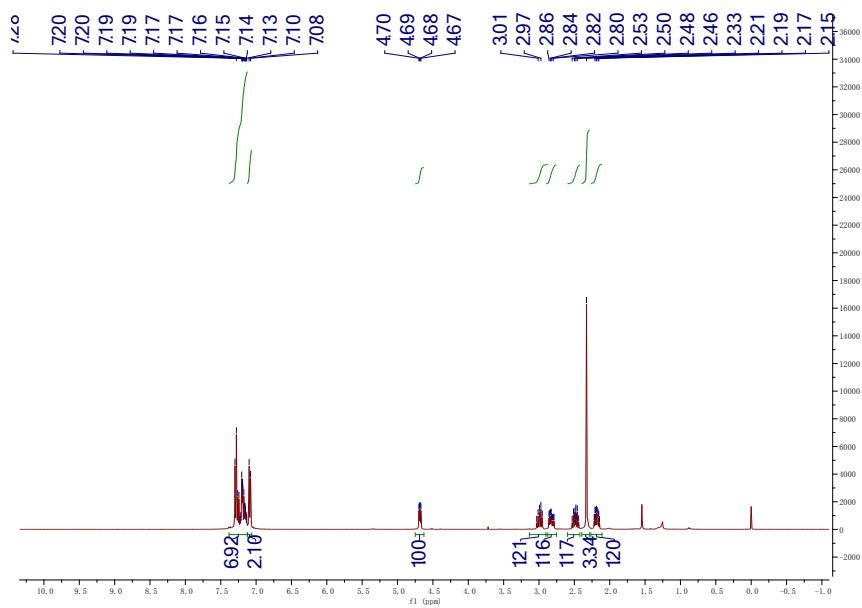

### 3j <sup>13</sup>C NMR

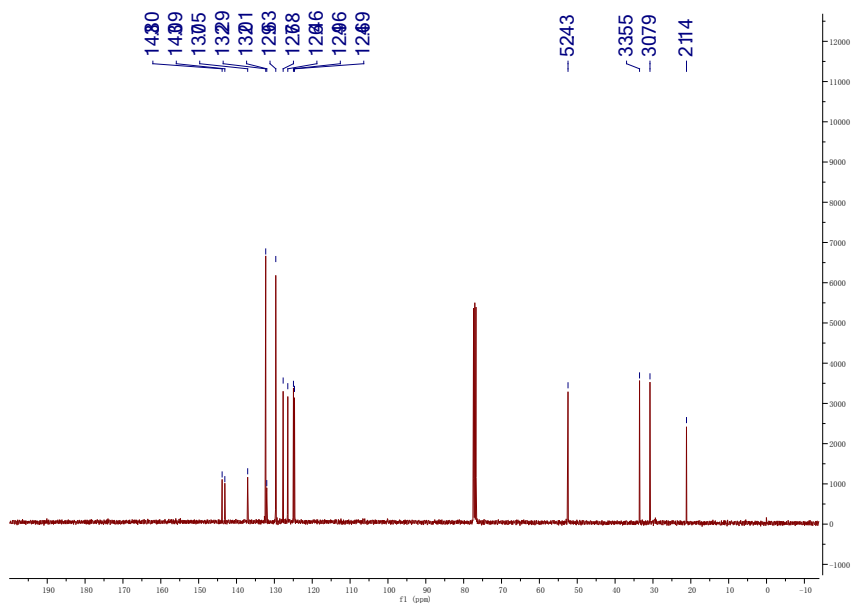

### 3k <sup>1</sup>H NMR

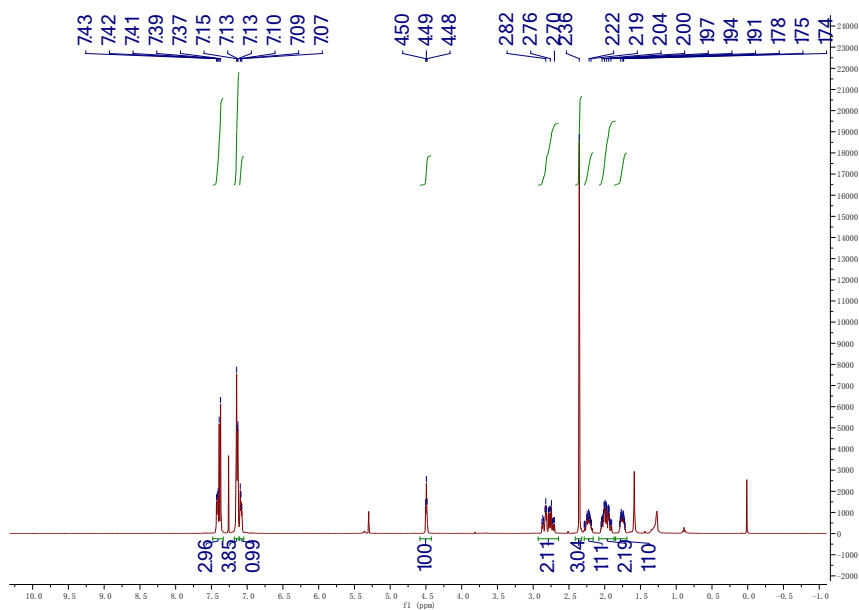

### 3k <sup>13</sup>C NMR

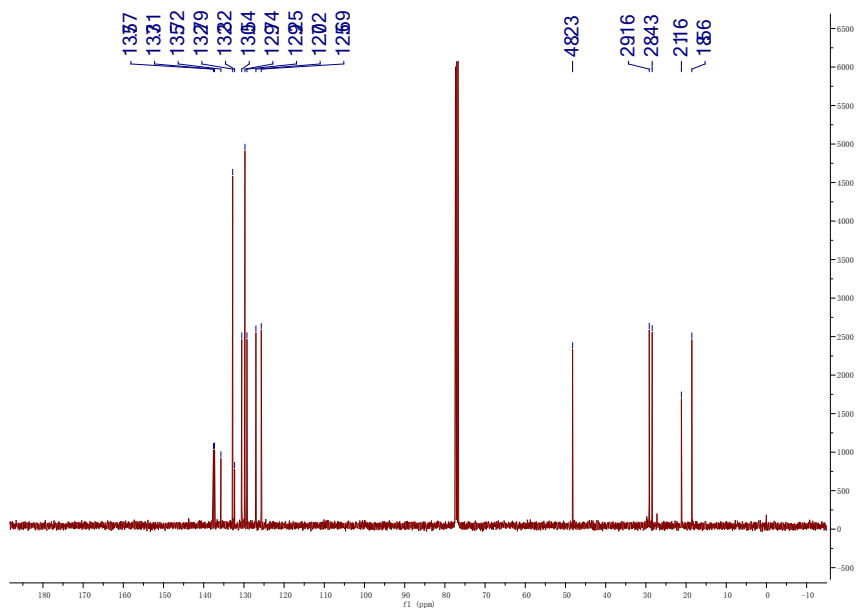



### 4a <sup>1</sup>H NMR

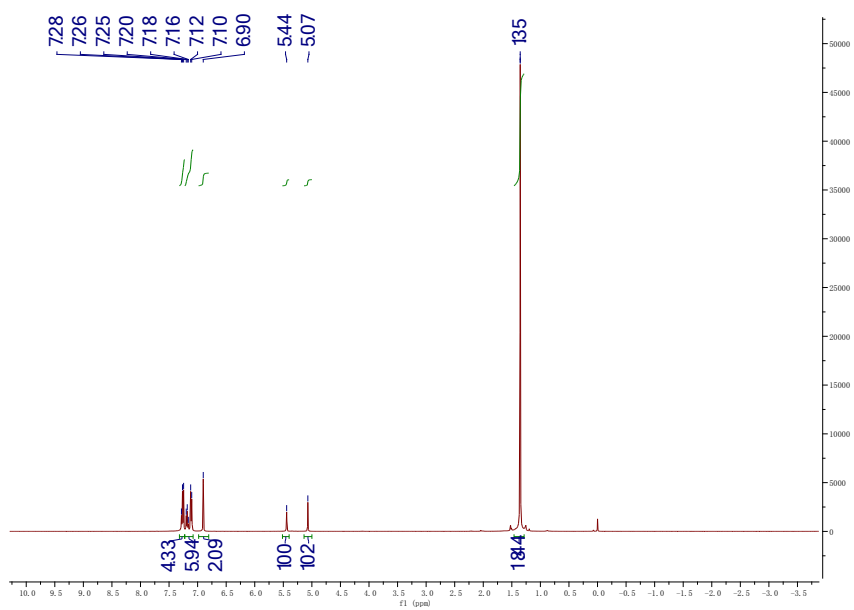

### 4a <sup>13</sup>C NMR

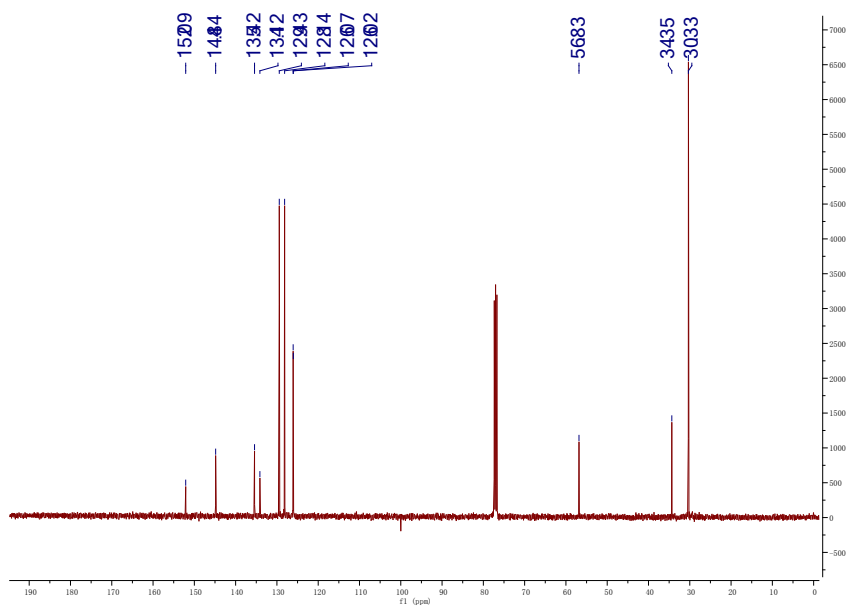

### 4b <sup>1</sup>H NMR

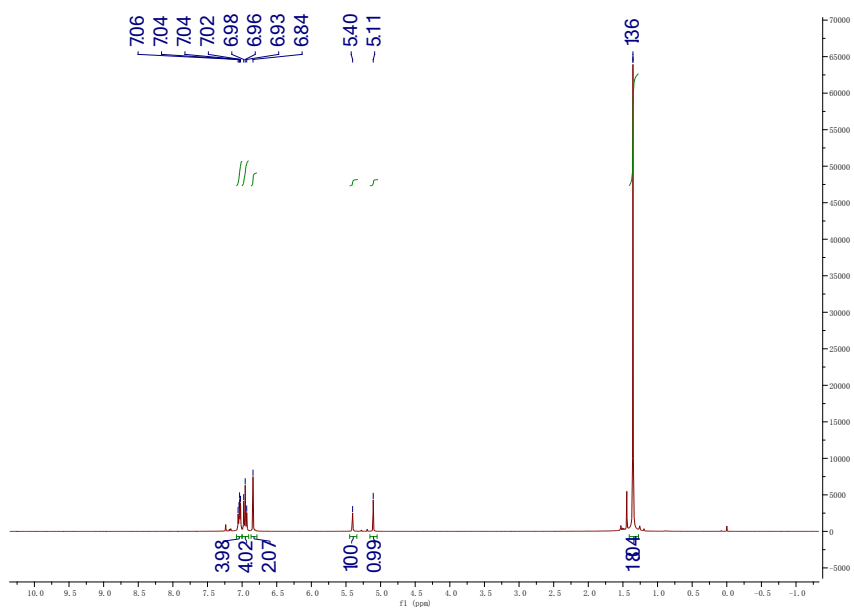

### 4b <sup>13</sup>C NMR

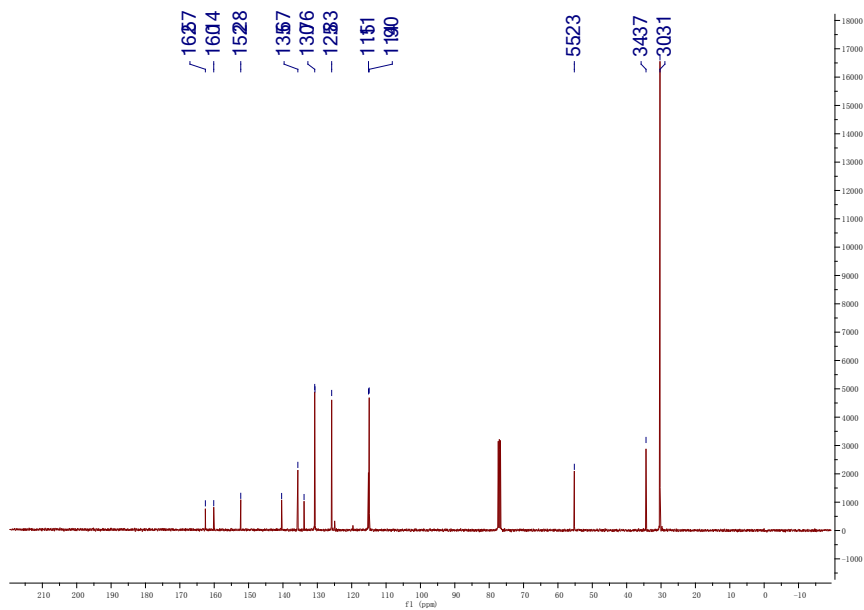

4b  $^{19}\text{F}$  NMR

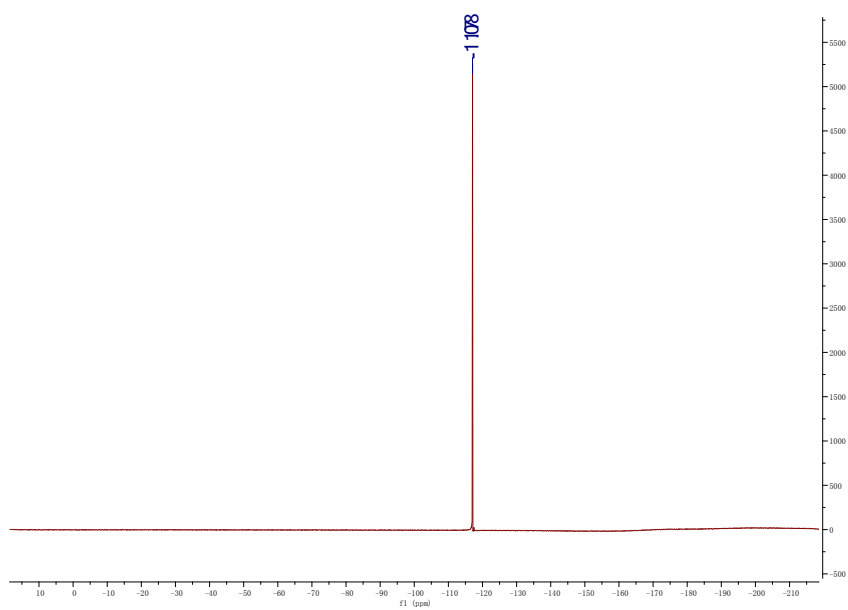

### 4c <sup>1</sup>H NMR

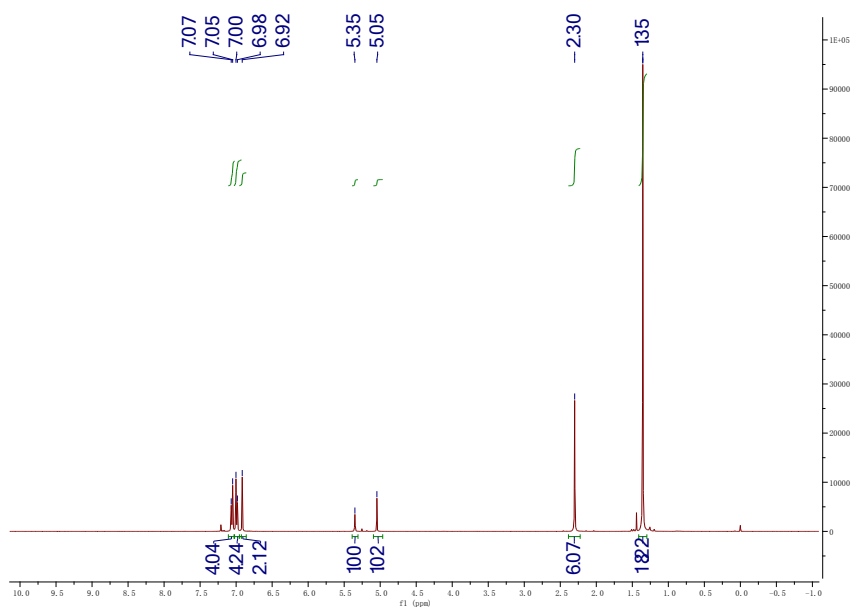

### 4c <sup>13</sup>C NMR

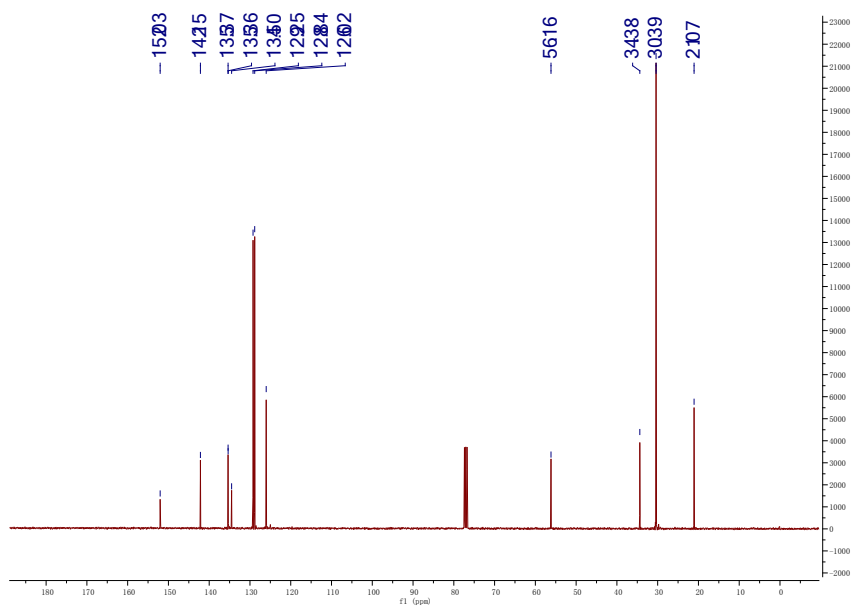

### 4d <sup>1</sup>H NMR

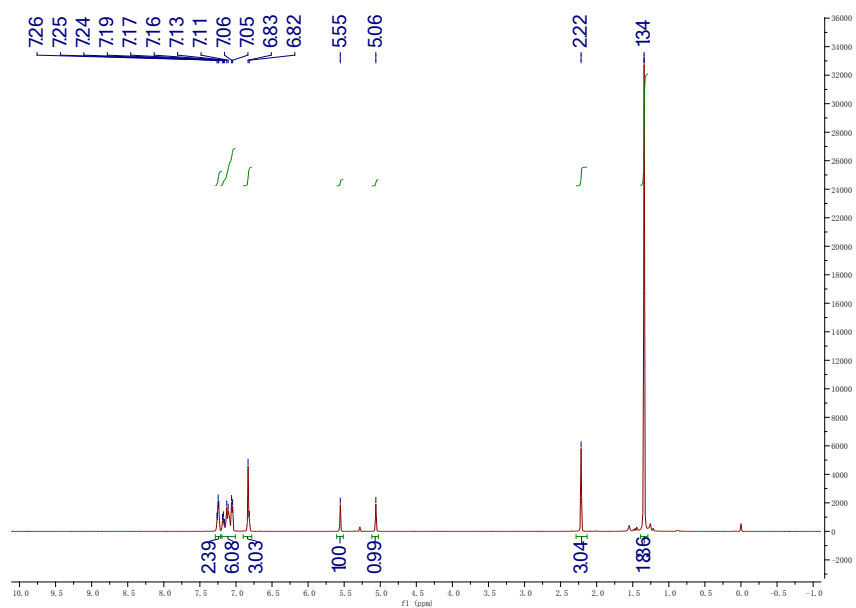

### 4d <sup>13</sup>C NMR

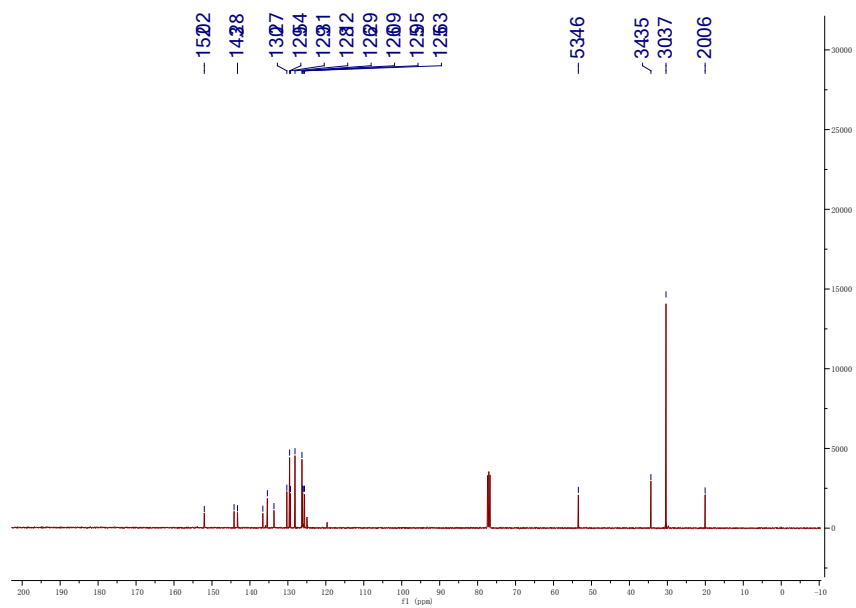

### 4e <sup>1</sup>H NMR

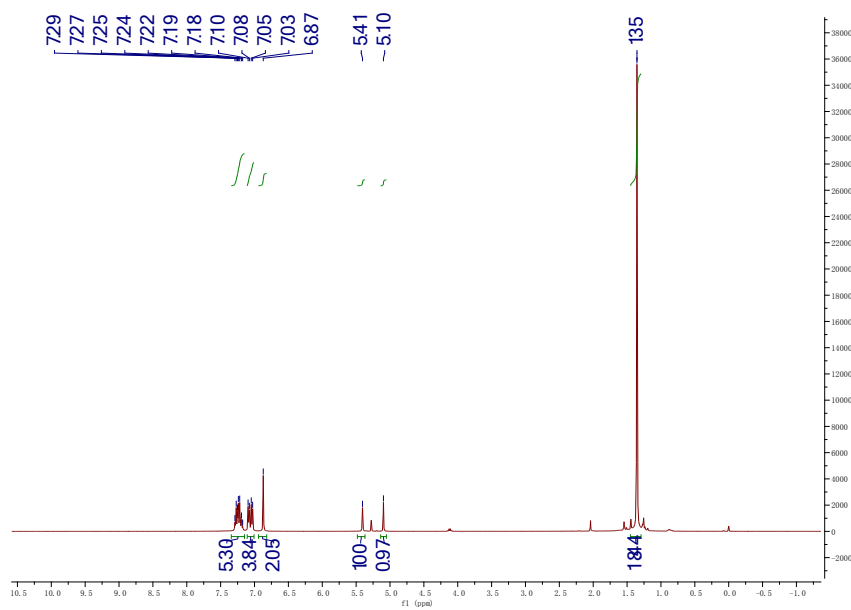

### 4e <sup>13</sup>C NMR

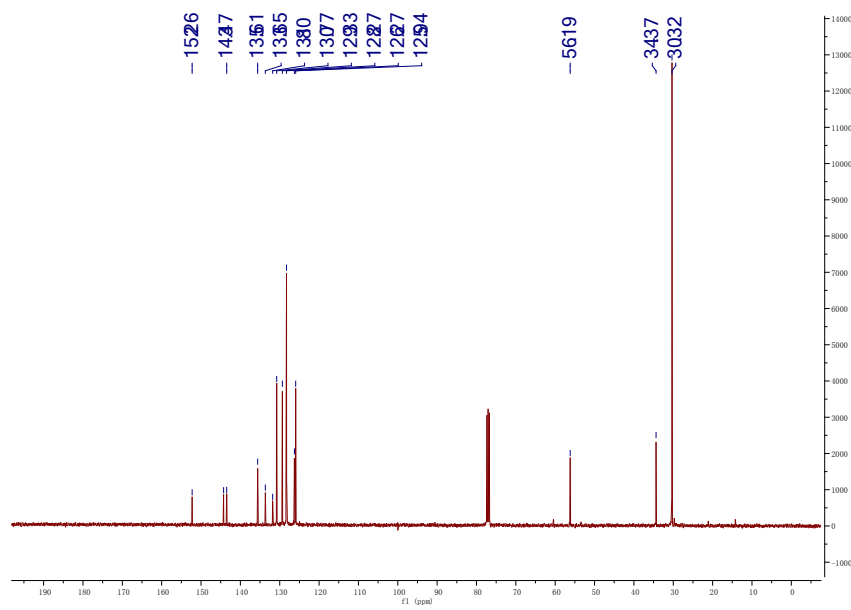

### 4f <sup>1</sup>H NMR

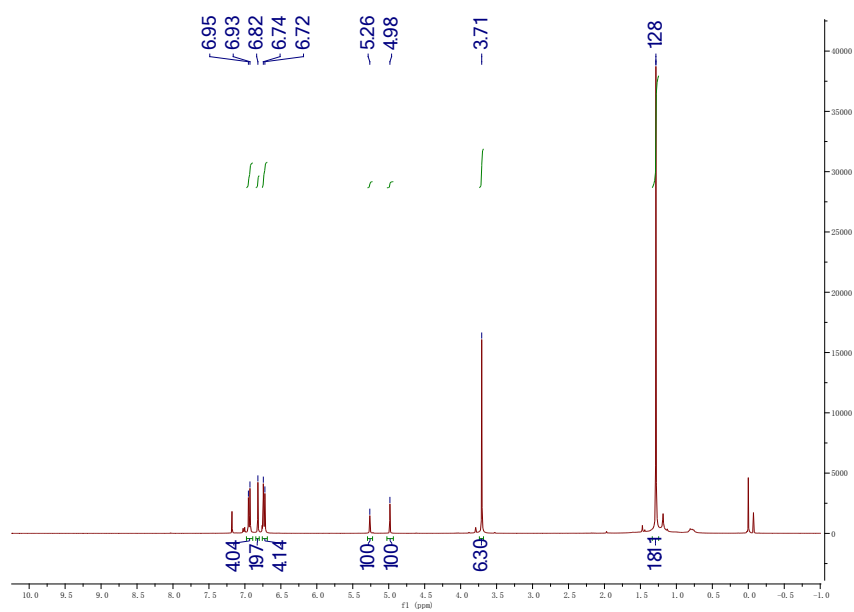

### 4f <sup>13</sup>C NMR

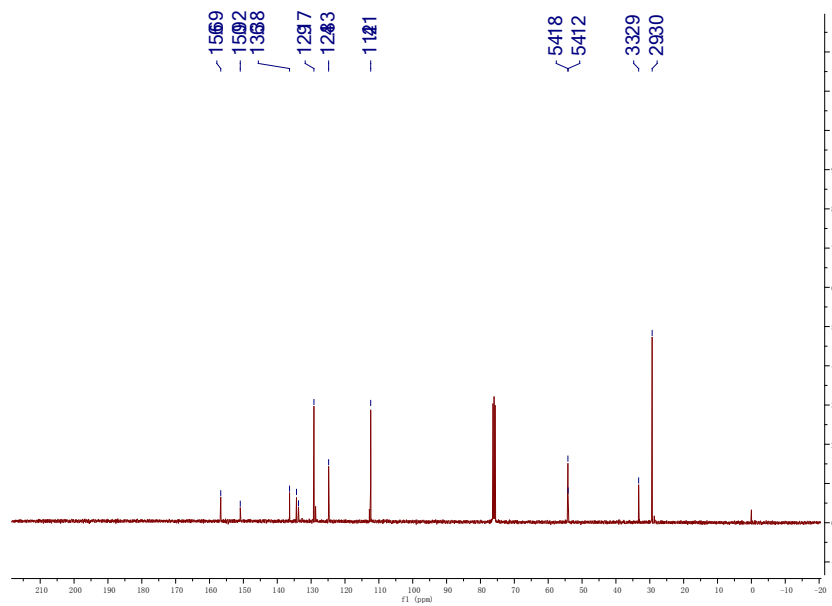

### 4g <sup>1</sup>H NMR

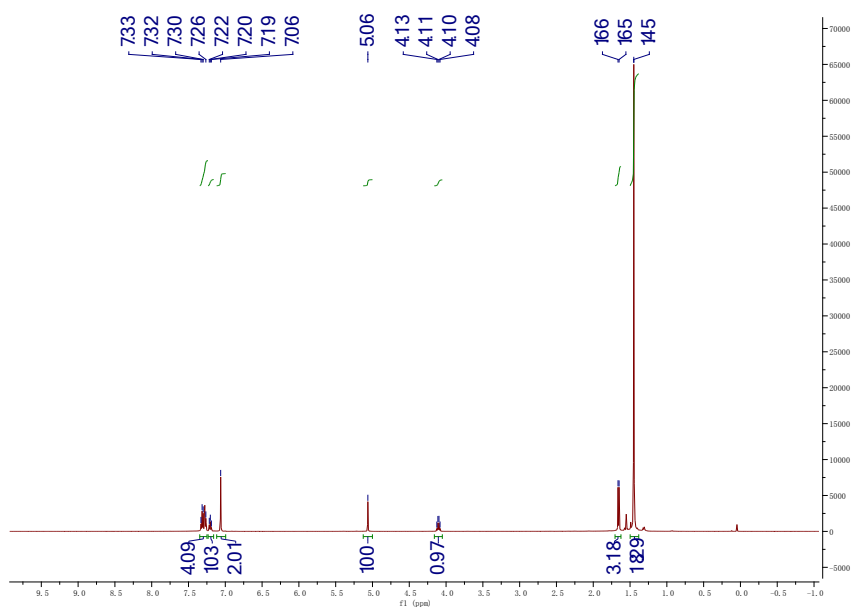

### 4g <sup>13</sup>C NMR

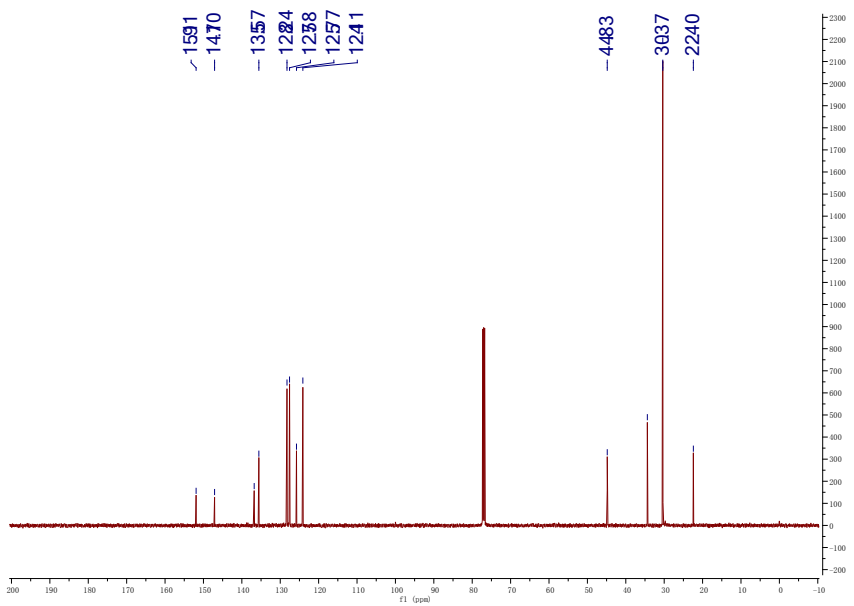



### 4h <sup>1</sup>H NMR

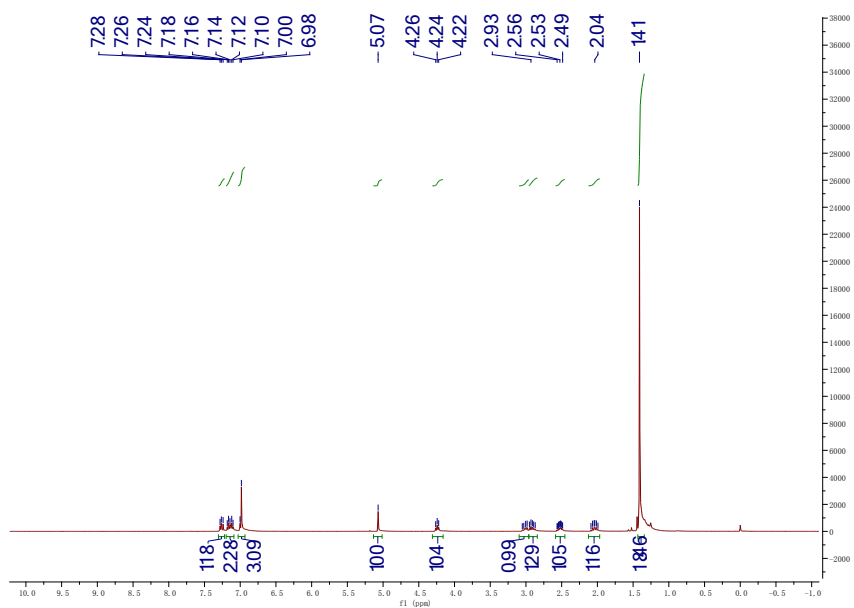

### 4h <sup>13</sup>C NMR

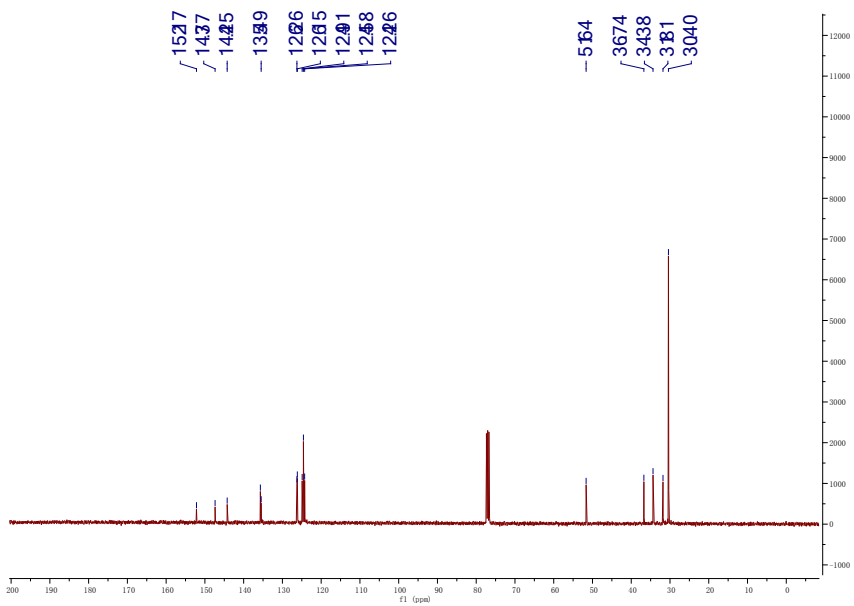

### 4i <sup>1</sup>H NMR

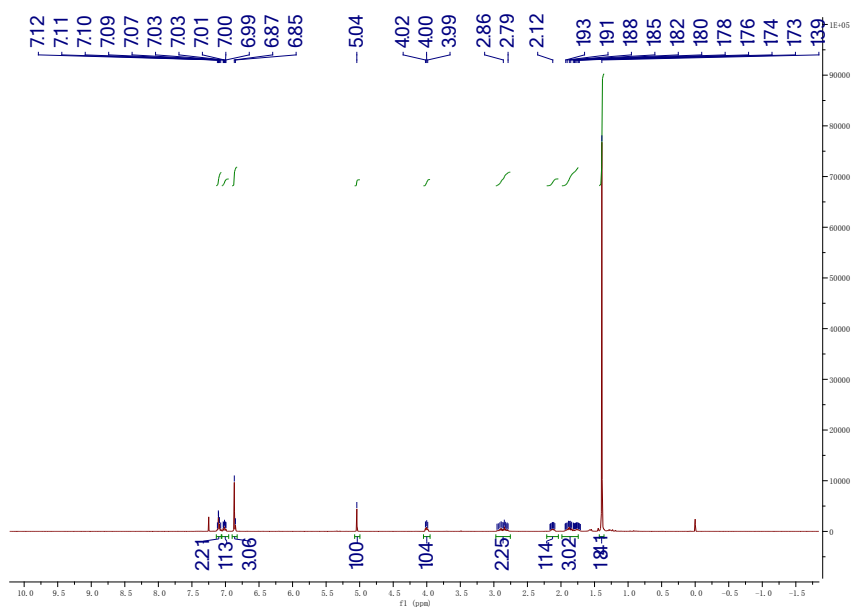

### 4i <sup>13</sup>C NMR

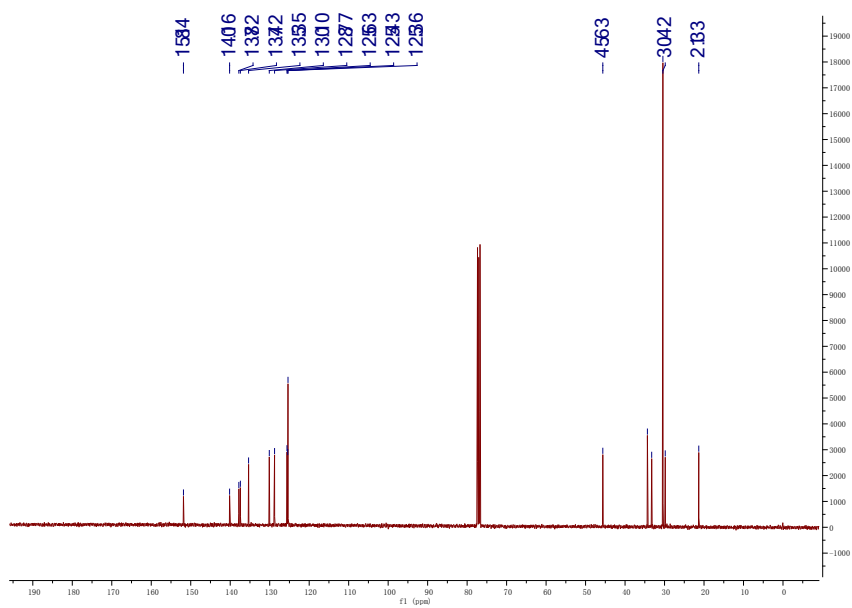

### 4j <sup>1</sup>H NMR

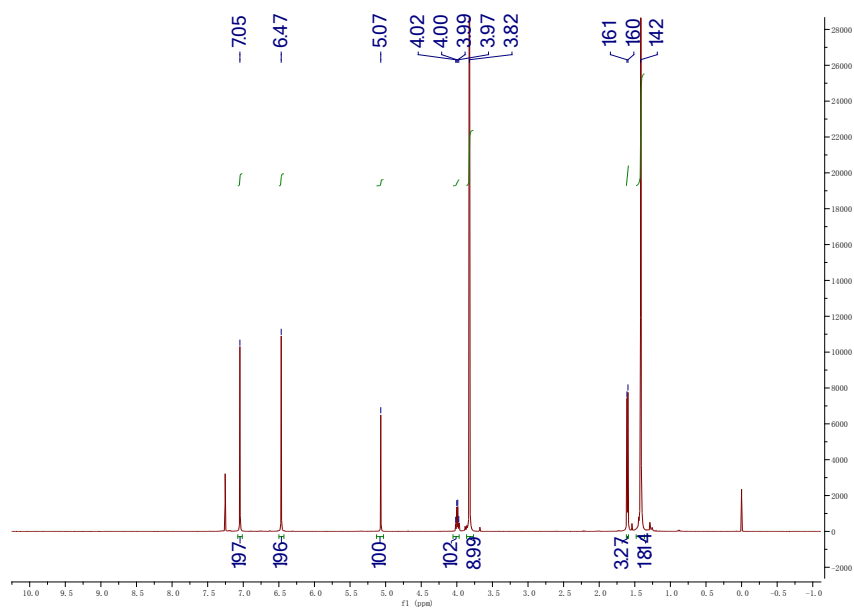

### 4j <sup>13</sup>C NMR

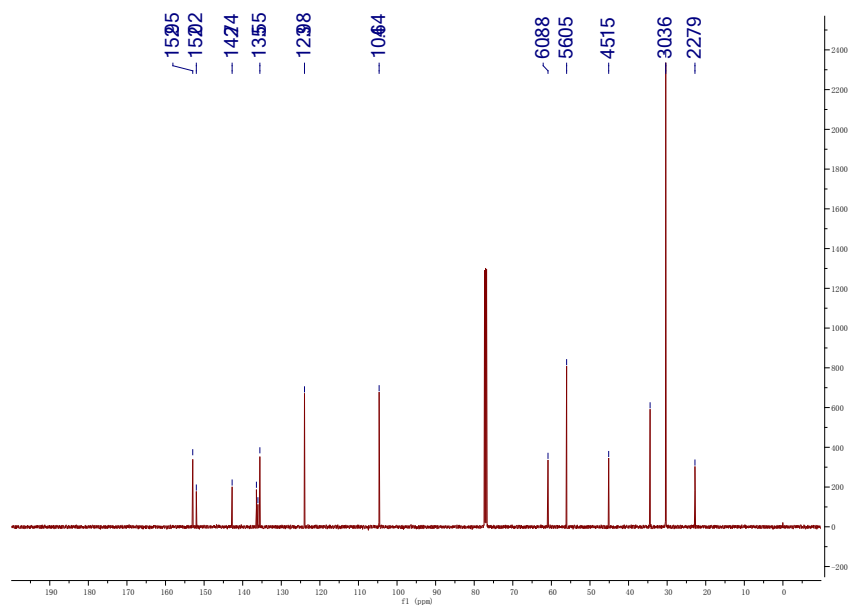

### 4k <sup>1</sup>H NMR

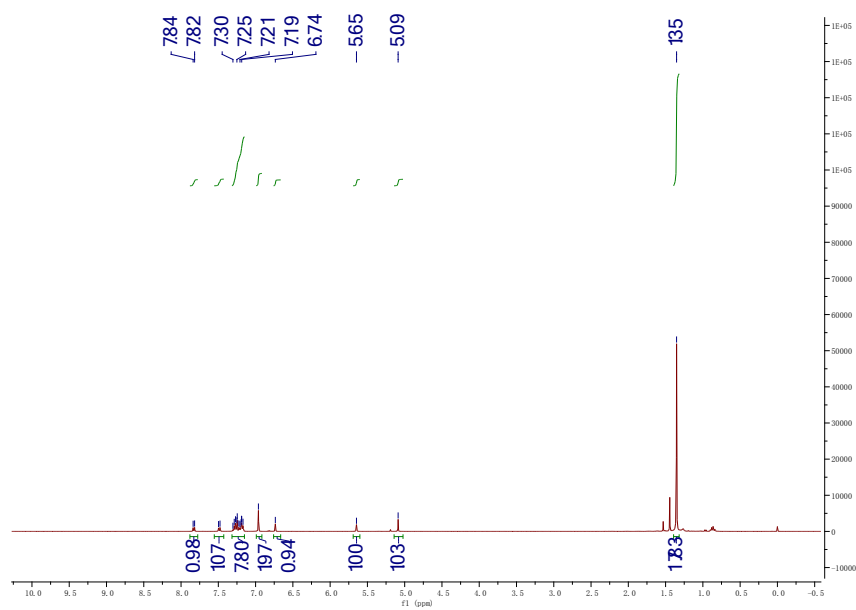

### 4k <sup>13</sup>C NMR

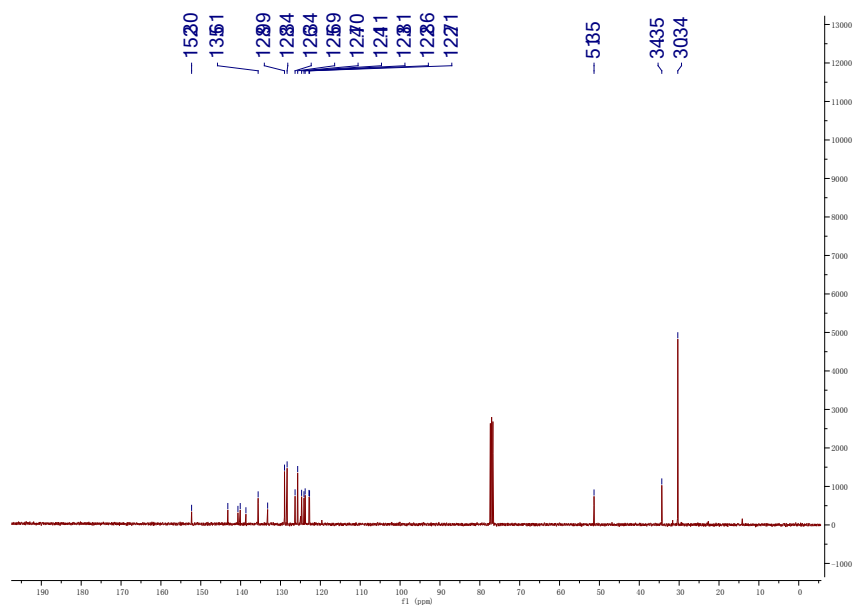

### 4I <sup>1</sup>H NMR

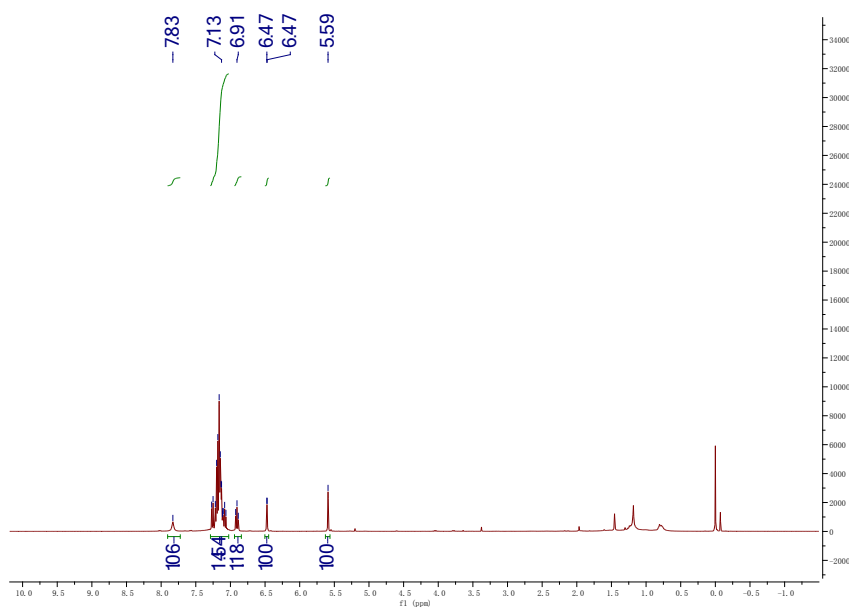

### 4I <sup>13</sup>C NMR

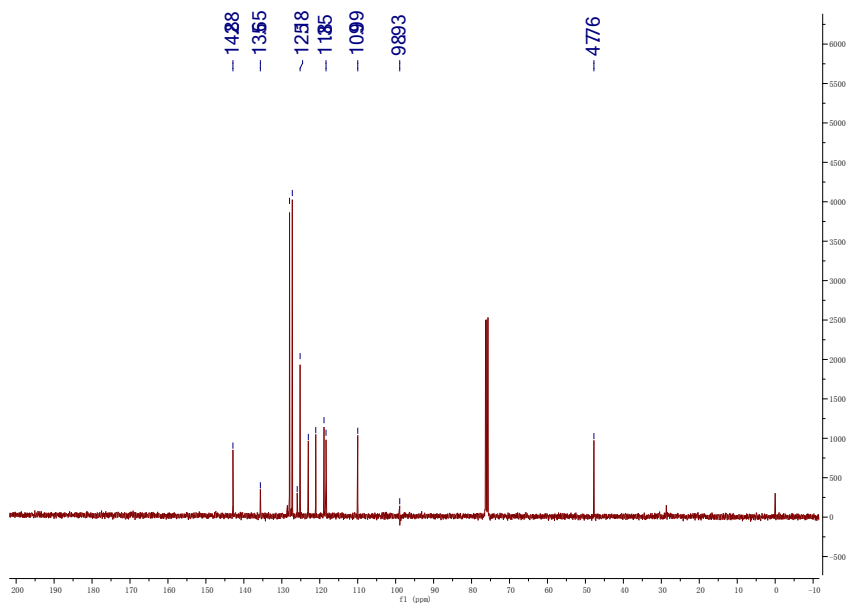

### 4o <sup>1</sup>H NMR

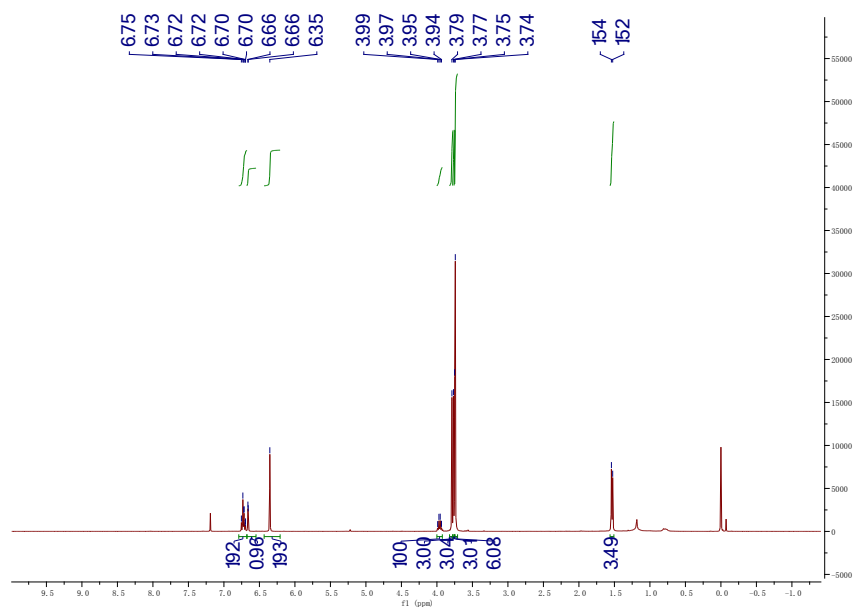

### 4o <sup>13</sup>C NMR

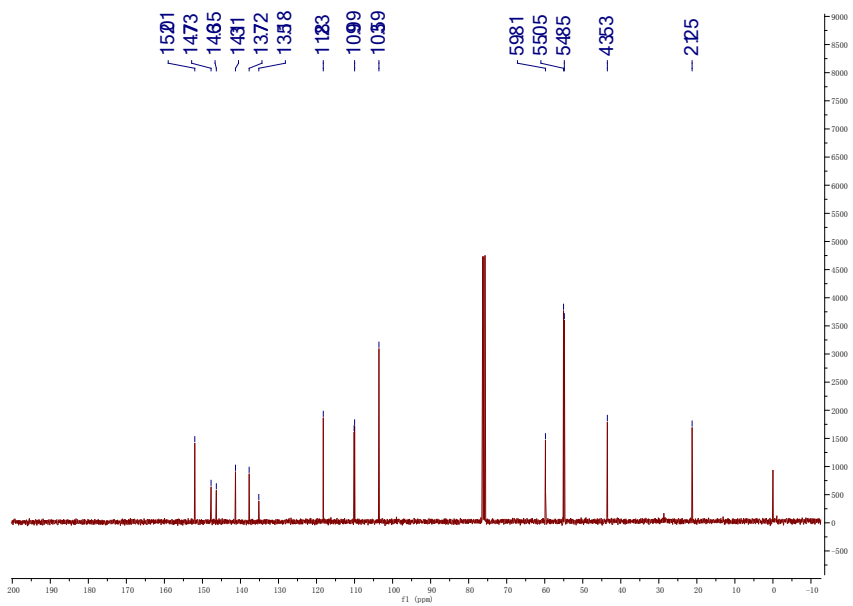

Supplement: c8ra05811c1.pdf [file c8ra05811c1.pdf]
